## A Leak K<sup>+</sup> Channel TWK-40 Regulates Rhythmic Motor Program in *C. elegans*

Zhongpu Yue<sup>1#</sup>, Yi Li<sup>1#</sup>, Bin Yu<sup>1#</sup>, Yueqing Xu<sup>2#</sup>, Lili Chen<sup>1</sup>, Jyothsna Chitturi<sup>4</sup>, Jun Meng<sup>4</sup>, Wesley Hung<sup>4</sup>, Yuhang Tian<sup>3</sup>, Sonia El Mouridi<sup>5,6</sup>, Cuntai Zhang<sup>3</sup>, Thomas Boulin<sup>5</sup>, Mei Zhen<sup>4</sup>, Shangbang Gao<sup>1,2\*</sup>

- 5 1. Key Laboratory of Molecular Biophysics of the Ministry of Education, College of Life Science and Technology, Huazhong University of Science and Technology, Wuhan 430074, China
2. College of Biomedical Engineering, South-Central University for Nationalities, Wuhan 430074, China
- 10 3. Department of Geriatrics, Tongji Hospital of Tongji Medical College, Huazhong University of Science and Technology, Wuhan, China
4. Lunenfeld-Tanenbaum Research Institute, Mount Sinai Hospital, University of Toronto, Toronto, Ontario M5G 1X5, Canada
- 15 5. Univ Lyon, Université Claude Bernard Lyon 1, MeLiS, CNRS UMR 5284, INSERM U1314, Institut NeuroMyoGène, Lyon 69008, France
6. King Abdullah University of Science and Technology (KAUST), Biological and Environmental Sciences and Engineering Division (BESE), Thuwal 23955–6900, Kingdom of Saudi Arabia

# **Equal contributions**

20 \* **Correspondence:** [sgao@hust.edu.cn](mailto:sgao@hust.edu.cn)

Running title: TWK-40 regulates the defecation rhythm

Key words: *twk-40*, K<sub>2P</sub> channel, motor rhythm, defecation, Ca<sup>2+</sup> oscillation, resting membrane potential

25 **Abstract**

Leak potassium ( $K^+$ ) currents, conducted by two-pore domain  $K^+$  ( $K_{2P}$ ) channels, are critical for the stabilization of the membrane potential. The effect of  $K_{2P}$  channels on motor rhythm remains enigmatic. We show here that the  $K_{2P}$  TWK-40 regulates the rhythmic defecation motor program (DMP) in *Caenorhabditis elegans*. Disrupting TWK-40 suppresses the expulsion defects of *nlp-40* and *aex-2* mutants. By contrast, a gain-of-function (*gf*) mutant of *twk-40* significantly reduces the expulsion frequency per DMP cycle. *In situ* whole-cell patch clamping demonstrates that TWK-40 forms an outward current that hyperpolarize the resting membrane potential of DVB neuron. In addition, TWK-40 substantially contributes to the rhythmic activity of DVB. Specifically, DVB  $Ca^{2+}$  oscillations exhibit obvious defects in *twk-40* mutants. Expression of TWK-40(*gf*) in DVB recapitulates the expulsion deficiency of the *twk-40(gf)* mutant, and inhibits DVB  $Ca^{2+}$  oscillations in both wild-type and *twk-40(lf)* animals. Moreover, DVB innervated enteric muscles also exhibit rhythmic  $Ca^{2+}$  defects. Taken together, these results demonstrate that TWK-40 is an essential neuronal inhibitor of DMP, thus revealing a cellular mechanism linking leak  $K_{2P}$  channels with rhythmic motor activity.

## Introduction

Two-pore domain potassium ( $K_{2P}$ ) channels conduct  $K^+$  leak currents. In contrast to voltage-gated  $K^+$  channels,  $K_{2P}$  channels are mostly voltage-independent and non-  
45 inactivating channels, which stabilize the cell's resting membrane potential (Enyedi and Czirjak, 2010). Along with most  $K_{2P}$  channels profiling by heterologous expression systems or in cultured primary cells, the channel associated behaviors and the intrinsic physiological characterization of specific  $K_{2P}$  channel have remained largely unknown.

The human genome encodes 15  $K_{2P}$  channels, which are grouped into six families  
50 based on their functional resemblance and structural similarity (Goldstein et al., 2005; Lesage and Lazdunski, 2000). Aberrant functions of  $K_{2P}$  channels have been implicated in various disorders associated with genetic variation. For example, mutations of human TASK-3 (KCNK9 p.Gly236Arg) cause *KCNK9* Imprinting Syndrome, a pediatric neurodevelopmental disease with severe feeding difficulties, delayed development and  
55 intellectual disability (Graham et al., 2016). With predicted conservation of amino acid sequences across species,  $K_{2P}$  channels associated genetic and functional investigations in animal models are emerging (Buckingham et al., 2005; Lalevee et al., 2006). For instance, cardiac-specific inactivation or overexpression of *Ork1*, a *Drosophila* two-pore domain potassium channel, led to an increase or a complete arrest of fly heart beating,  
60 respectively (Lalevee et al., 2006).

The nematode *Caenorhabditis elegans* (or *C. elegans*) genome contains a large family with at least 47  $K_{2P}$  genes (Bargmann, 1998; Buckingham *et al.*, 2005). This large set of  $K_{2P}$  channels may allow for exceptionally fine 'tuning' of the firing activity of individual cells within the very compact nematode nervous system (Salkoff et al., 2001;

65 Witvliet et al., 2021). Encouraged by the increasing understanding of the molecular and cellular wiring of the worm's neural network (Bargmann, 1998; Cook et al., 2019; White et al., 1986; Witvliet *et al.*, 2021), we use *C. elegans* to explore the functional complexity of  $K_{2P}$  channels as potential regulators of rhythmic motor behaviors *in vivo* (Ben Soussia et al., 2019; Wang et al., 1999).

70 The *C. elegans* defecation motor program (DMP) exhibits a highly coordinated ultradian rhythm. It is achieved by periodically activating a stereotyped sequence of muscle contractions, including the initial contraction of posterior body wall muscles (pBoc), followed by the second contraction of anterior body wall muscles (aBoc), and the final contraction of enteric muscles (EMC) (Thomas, 1990). Driven by the synchronizing  
75 activity of electrically-coupled DVB and AVL motor neurons (Choi et al., 2021), EMC leads to the robust expulsion (Exp) of gut contents (**Figure 1A**) (Dal Santo et al., 1999; Liu and Thomas, 1994). Unlike most rhythmic motor circuits that are composed of a central pattern generator (CPG) neural network or self-oscillating pacemaker neurons (Marder and Calabrese, 1996), the expulsion rhythm is precisely timed by endogenous  
80 calcium oscillation signals from the intestine (Branicky and Hekimi, 2006; McIntire et al., 1993a). The intestinal  $IP_3$  receptor/*itr-1*-driven pacemaker  $Ca^{2+}$  oscillations trigger a  $Ca^{2+}$ -dependent secretion of neuropeptide NLP-40, which activates the neuronal G protein-coupled receptor (GPCR) AEX-2 in DVB and AVL (Mahoney et al., 2008; Nehrke et al., 2008; Teramoto and Iwasaki, 2006; Wang et al., 2013). GABA release  
85 from DVB (McIntire et al., 1993b), cyclically initiated by NLP-40 (Wang *et al.*, 2013), activates the muscular excitatory GABA-gated cation channel EXP-1 to drive the final contraction of enteric muscles (**Figure 1B**) (Beg and Jorgensen, 2003). Deficiency of

either NLP-40, AEX-2 or EXP-1 results in serious expulsion defects in *C. elegans*.

Although the intestinal  $\text{Ca}^{2+}$  oscillation sets the instructive timing signal of the expulsion

90 rhythm (Branicky and Hekimi, 2006; McIntire *et al.*, 1993a), the cellular processes that control the expulsion rhythm in the intestine-neuron-muscle circuit are still unclear.

We show here that loss of function of *twk-40* – a two-pore domain potassium channel subunit – specifically suppresses the expulsion defects of *nlp-40* and *aex-2* mutants, but not of *exp-1* mutant. TWK-40 exhibits the common structural features of  $\text{K}_{2\text{P}}$

95 channel based on sequence analyses. The single subunit of TWK-40 has four transmembrane regions and two pore-forming domains (**Figure 2A**), which exhibit sequence similarity with the mammalian TASK (tandem-pore-acid-sensing  $\text{K}^+$ ) subfamily

(**Supplementary Figure 1A**). A gain of function mutant of *twk-40(bln336)*, generated by CRISPR/Cas9 gene editing (Ben Soussia *et al.*, 2019), induces an expulsion defect by

100 reducing the frequency of expulsion per DMP cycle. Moreover, *in-situ* whole-cell patch clamping revealed a *twk-40*-dependent outward  $\text{K}^+$  current that regulates the resting membrane potential (RMP) in DVB neurons, in which the RMP was depolarized in *twk-*

*40(lf)* and hyperpolarized in *twk-40(gf)* mutant, respectively. In combination with real-time  $\text{Ca}^{2+}$  imaging, we provide several lines of evidence to demonstrate that TWK-40

105 regulates rhythmic motor behaviors – including defecation – by cell-autonomously regulating DVB's resting membrane potential.

Remarkably, we also found recently that TWK-40 modulates global locomotor activity by regulating the activity of the AVA premotor interneuron (Meng *et al.*, 2022).

Briefly, *twk-40(lf)* mutant animals exhibit exaggerated body bends during both forward

110 and backward movement, and more frequent and prolonged reversals. *twk-40(gf)* mutant

animals, by contrast, exhibit strongly altered locomotion including obvious decreased body bending and velocity in both forward and backward undulation. Heterologous expression of the TWK-40 in HEK293T cells produced a voltage-insensitive  $K^+$  selective  $K_{2P}$ -like ion channel. Therefore, the  $K_{2P}$  channel TWK-40 is required for the generation  
115 of multiple motor rhythms, including the defecation and locomotion motor programs.

## Results

### *twk-40(lf)* suppresses the expulsion defect of *nlp-40* and *aex-2* mutants

To determine a potential role of the TWK-40  $K_{2P}$  channel in the cellular mechanisms controlling rhythmic DMP activity, we took advantage of three *exp* mutants that disrupt  
120 DMP in different tissues within the expulsion motor circuit (**Figure 1B**). First, *nlp-40(tm4085)*, an instructive neuropeptide from the intestinal pacemaker that delivers temporal information to the DVB neuron (Wang *et al.*, 2013). Second, *aex-2(sa3)*, a G-protein-coupled receptor that functions as the DVB receptor for NLP-40 (Mahoney *et al.*, 2008; Wang *et al.*, 2013). And the third, *exp-1(sa6)*, which encodes an excitatory GABA  
125 receptor expressed in enteric muscles (Beg and Jorgensen, 2003; Lee *et al.*, 2005). Loss-of-function mutants of these genes induced severe expulsion defects (**Figure 1C, E, G**) by disrupting the normal function of the intestine, DVB neuron and enteric muscles, respectively.

We reasoned that a loss of the potassium conductance *twk-40* would increase the  
130 excitability of cells within the circuit and compensate the inhibitory effect of the *nlp-40*, *aex-2*, or *exp-1* mutations. Hence, we combined the *twk-40* allele *hp834* (**Figure 2A**) (Meng *et al.*, 2022) with each DMP mutation. *hp834* contains a 7 bp deletion of the sequence (GTTCGAG) at the base of 127-133 exon before the first pore-forming domain

of T28A8.1a (**Figure 2A**), causing a frameshift and subsequent premature stop codon of  
135 *twk-40a* (Meng *et al.*, 2022), one of three annotated isoforms of *twk-40*  
([www.wormbase.org](http://www.wormbase.org)). We found that *twk-40(hp834)* significantly improved the  
expulsion defect in *nlp-40* and *aex-2* mutants (**Figure 1C-F**). Specifically, the expulsion  
frequency per DMP was increased in *nlp-40(tm4085); twk-40(hp834)* ( $0.18 \pm 0.02$  Exp per  
cycle) or *aex-2(sa3); twk-40(hp834)* ( $0.15 \pm 0.02$  Exp per cycle), when compared to the  
140 single mutants of *nlp-40(tm4085)* ( $0.08 \pm 0.01$  Exp per cycle) and *aex-2(sa3)* ( $0.08 \pm 0.01$   
Exp per cycle), respectively (**Figure 1C-F**). Similar expulsion defect suppression was  
observed in another *twk-40(lf)* allele *hp733* (**Supplementary Figure 1B**), which harbors  
a missense mutation that changes an amino acid at the end of the first transmembrane  
domain (E58K) (Meng *et al.*, 2022). By contrast, no substantial suppression of the  
145 expulsion defect of *exp-1* mutants was observed for either loss-of-function allele of *twk-*  
*40*. Indeed, no difference in expulsion frequency was observed between *exp-1(sa6)*  
( $0.17 \pm 0.01$  Exp per cycle) and *exp-1(sa6); twk-40(hp834)* ( $0.17 \pm 0.01$  Exp per cycle) or  
*exp-1(sa6); twk-40(hp733)* ( $0.16 \pm 0.01$  Exp per cycle) double mutants, respectively  
(**Figure 1G, H, Supplementary Figure 1B**). These results demonstrated that *twk-40* is  
150 selectively required for rhythmic defecation regulation, upstream of *exp-1*.

#### ***A twk-40 gain-of-function mutation reduces expulsion frequency***

The selective suppression of *exp* defects in distinct *exp* mutants suggested that *twk-*  
*40*, *per se*, may regulate the DMP. Indeed, in *twk-40(hp834, lf)* single mutants, the  
expulsion number was modestly but significantly increased ( $13.87 \pm 0.21/10$  min)  
155 compared to wild-type animals ( $12.97 \pm 0.19/10$  min) (**Figure 2C, D**). Similar results were

also observed in *twk-40(hp733)* mutants. These results confirm that *twk-40* regulates the DMP negatively.

To further confirm the involvement of *twk-40* in the defecation motor program, we examined the expulsion step in a gain-of-function mutant allele of *twk-40*, *bln336* (Figure 2A). These mutants harbor a pan-K<sub>2P</sub> activating mutation (Ben Soussia *et al.*, 2019) that promotes the gating of vertebrate and invertebrate K<sub>2P</sub> channels. Indeed, heterologous expression of the corresponding TWK-40(L159N) channel in HEK293T cells showed ~5 fold current increase from the wild-type TWK-40 (Meng *et al.*, 2022). Consistent with an inhibitory function of *twk-40*, we observed a strongly reduced expulsion frequency (4.8±0.25/10 min) in *twk-40(bln336, L159N)* animals, i.e. approximately 25% of wild type (12.97±0.19/10 min) (Figure 2C, D). Thus, gain-of-function of *twk-40* inhibits the expulsion rhythm, which encouraged us to further investigate the functional effects of *twk-40* loss- and gain-of-function mutants.

#### ***twk-40 regulates expulsion in the DVB neuron***

To pinpoint the exact role of *twk-40* in the DMP, we first assessed its cellular focus of action. Loss of *twk-40* suppressed the *exp* defect of *nlp-40* and *aex-2* mutants but not of *exp-1*, indicating that *twk-40* regulates the expulsion frequency from the intestine and/or expulsion neurons. Indeed, functional TWK-40 driven by a small fragment of its upstream region (*Ptwk-40::TWK-40::sl2dGFP*, Methods) revealed the expression exclusively in the nervous system and intestine (Figure 2B). The neuronal expression pattern includes the excitatory ventral motor neurons (A- and B-types), but no expression was observed in inhibitory D-motor neurons. Meanwhile, sparse labeling of head and tail



neurons was also observed, including the DVC interneuron (strong) and the excitatory GABAergic DVB motor neuron/interneuron (moderate) (**Figure 2B**).

180 We then systematically tested the tissue or cell requirements of *twk-40* for the expulsion behavior. A wild-type TWK-40 cDNA driven by different promoters was competitively expressed in *twk-40(bln336, gf)* mutant ( $0.26 \pm 0.02$  Exp per cycle), in an attempt to reduce its severe *exp* defect. Expression of wild-type TWK-40 (i.e., TWK-40(WT)) by the short promoter *Ptwk-40* (Methods) rescued the animal's expulsion  
185 frequency to ( $0.55 \pm 0.04$  Exp per cycle) (**Figure 2E**). Expression of TWK-40(WT) in GABAergic DVB/AVL/D-motor neurons (*Punc-47*), also significantly restored the DMP ( $0.67 \pm 0.06$  Exp per cycle). More importantly, when we restored TWK-40(WT) expression exclusively in the DVB neuron (*Pflp-10*) (Choi *et al.*, 2021), the expulsion defect of *twk-40(bln336, gf)* mutant was rescued ( $0.7 \pm 0.06$  Exp per cycle). In contrast,  
190 expression of the TWK-40(WT) in the intestine (*Pges-1*,  $33.2 \pm 1.9\%$ ) (**Supplementary Figure S1C**) or D-motor neurons (*Punc-25s*,  $33.8 \pm 5.6\%$ ) (Jin *et al.*, 1999), however, did not restore a normal expulsion frequency (**Figure 2E**). Therefore, consistent with the expression pattern, these results suggest that regulation of the expulsion rhythm by *twk-40* requires DVB neurons.

195 To further confirm this notion, we ectopically expressed the TWK-40(L159N) gain-of-function mutant in DVB neurons. Indeed, in the wild-type N2 background, TWK-40(L159N) expression in DVB (*Ptwk-40*, *Punc-47* or *Pflp-10*) resembled the expulsion defect as found in *twk-40(bln336)* mutant animals, exhibiting strongly reduced expulsion frequency per cycle (**Figure 2F**). TWK-40(L159N) expression only in D-MNs (*Punc-*

200 25s), however, could not replicate this defect. Similar phenotypes were also observed by expressing TWK-40(L159N) in a *twk-40(lf)* mutant context (**Figure 2G**).

Taken together, these results demonstrate that *twk-40* is sufficient and necessary in DVB neurons for the regulation of the expulsion rhythm.

### ***Rhythmic Ca<sup>2+</sup> oscillation of the DVB neuron is disrupted in twk-40 mutants***

205 To determine whether *twk-40* directly regulates DVB's neuronal activity, we performed Ca<sup>2+</sup> imaging in animals expressing the genetically encoded Ca<sup>2+</sup> sensor GCaMP6s in the DVB neuron (**Figure 3A**) (Li et al., 2023). We conducted the Ca<sup>2+</sup> imaging in a liquid environment on restricted animals, in which DVB exhibited tight correlation of rhythmic Ca<sup>2+</sup> oscillations with cyclic expulsion behavior (**Figure 3B-D**).

210 In wild-type animals, DVB fired periodic Ca<sup>2+</sup> spikes (or Ca<sup>2+</sup> oscillations) with a frequency of 4.5±0.3 Hz/300s (**Figure 3B, E, F**). To verify these Ca<sup>2+</sup> spikes represent pacemaker-activated DVB activation, we examined their dependence on NLP-40, the instructive neuropeptide from the intestinal pacemaker that delivers temporal information to the DVB neuron (Wang *et al.*, 2013). Consistent with previous reports (Choi *et al.*, 2021; Wang *et al.*, 2013), we observed severe decrease in both DVB Ca<sup>2+</sup> and expulsion frequency in the *nlp-40(tm4085)* mutant (**Supplementary Figure S2A-C**). These results demonstrate that the activation dynamics of DVB are indeed dependent on the NLP-40-initiated pacemaker signal.

220 In *twk-40(bln336, gf)* mutants, the frequency of Ca<sup>2+</sup> spikes was significantly reduced to 3.2±0.3 Hz/300s (**Figure 3E, F**). Interestingly, the Ca<sup>2+</sup> amplitude was also diminished in *twk-40(bln336, gf)* mutants (**Figure 3G**). Conversely, in *twk-40(hp834, lf)* mutants, the Ca<sup>2+</sup> frequency was significantly increased to 5.9±0.5 Hz/300s. Yet, the Ca<sup>2+</sup>

amplitude of *twk-40(hp834)* was unchanged (**Figure 3G**), and the individual  $\text{Ca}^{2+}$  spike kinetics – including the rise and decay time – were not modified either (**Supplementary**  
225 **Figure S3A-C**), suggesting that *twk-40* contributes to the basal-activity of the DVB neuron. Taken together, our experiments demonstrate that the intrinsic DVB  $\text{Ca}^{2+}$  oscillation activity was substantially regulated by *twk-40*.

To further decipher *twk-40*'s cellular specificity, we firstly measured neuronal  $\text{Ca}^{2+}$  activity by expressing wild-type TWK-40 cDNA under different exogenous promoters in  
230 a *twk-40(bln336, gf)* mutant background. Consistent with our behavioral data, the  $\text{Ca}^{2+}$  frequency and amplitude were partially rescued when TWK-40(WT) was expressed in DVB in *twk-40(bln336, gf)* mutants (**Figure 4A-C**). By contrast, neither frequency nor amplitude was restored when TWK-40(WT) was expressed in D-motor neurons (**Figure 4C**). In addition, we then expressed TWK-40(WT) in *twk-40(hp834, lf)* mutant and found  
235 that the increased  $\text{Ca}^{2+}$  frequency of these mutants could also be rescued to wild-type levels when TWK-40(WT) was expressed in DVB (**Figure 4D-F**). Thus, TWK-40(WT) is sufficient to restore the neuronal  $\text{Ca}^{2+}$  activity of the DVB neurons.

Collectively, these results support the notion that *twk-40* regulates neuronal  $\text{Ca}^{2+}$  oscillations of the DVB neuron.

#### 240 *twk-40 cell-autonomously regulates DVB $\text{Ca}^{2+}$ oscillations*

The broad neuronal expression pattern of *twk-40* indicates that TWK-40 may regulate the DMP not limited in the DVB neuron (White *et al.*, 1986). To examine whether synaptic input upstream of DVB may play a role, we examined the DVB  $\text{Ca}^{2+}$  oscillations in an *unc-13(lf)* background (Wang *et al.*, 2013). UNC-13 is a conserved and  
245 essential presynaptic  $\text{Ca}^{2+}$  effector that triggers exocytosis and neurotransmitter release

(Brose et al., 1995; Gao and Zhen, 2011; Richmond and Jorgensen, 1999). Loss of function of *unc-13* strongly impairs global neurotransmission with minor effect on NLP-40 release (Wang et al., 2013). Interestingly, in the *unc-13(lf)* mutant background, we found that  $Ca^{2+}$  oscillation defects were retained in *twk-40* mutants, including the  
250 decreased frequency and amplitude in *twk-40(bln336, gf)* mutants and increased frequency in *twk-40(hp834, lf)* mutants (**Supplementary Figure S4A-C**). These results demonstrate that potential presynaptic inputs to DVB don't interfere with the regulation of DVB's  $Ca^{2+}$  activities by TWK-40, and that *twk-40* most likely regulates the cellular excitability of DVB neuron in a cell-autonomous manner.

255 To reinforce this notion, we further tested TWK-40's inhibition of DVB by measuring the  $Ca^{2+}$  oscillation in different transgenic lines that expressed the *twk-40(L159N, gf)* cDNA. When TWK-40(L159N) was expressed in DVB in wild-type animals (*Ptwk-40*, *Punc-47* or *Pflp-10*), the frequency and amplitude of  $Ca^{2+}$  spikes were significantly reduced (**Supplementary Figure S5A**), similar to *twk-40(bln336, gf)*  
260 mutants (**Supplementary Figure S5B, C**). By contrast, expression of TWK-40(L159N) in D-motor neurons had no effect. Furthermore, reduced  $Ca^{2+}$  oscillations were also observed when TWK-40(L159N) was expressed in a *twk-40(hp834, lf)* mutant background (**Supplementary Figure S5E-F**). These results reveal that ectopic expression of TWK-40(L159N) is sufficient to silence the  $Ca^{2+}$  oscillation of DVB  
265 neurons. Namely, TWK-40 execute a dominant inhibition of the intrinsic activity regulation in DVB neuron.

***DVB activity regulates  $Ca^{2+}$  dynamics in enteric muscles***

The expulsion behavior ultimately relies on the coordinated contraction of a group of muscles, including the anal depressor and sphincter, and two enteric muscles (EM),

270 which wrap around the posterior gut to further pressurize the intestinal contents (McIntire *et al.*, 1993b). EMs are innervated by DVB (**Figure 5A**) and AVL neurons (McIntire *et al.*, 1993b; White *et al.*, 1986), and the contraction of EMs is driven by intracellular  $\text{Ca}^{2+}$  transients (LeBoeuf and Garcia, 2017). We then ask whether EM  $\text{Ca}^{2+}$  activity is also regulated in *twk-40* mutants.

275 We thus performed  $\text{Ca}^{2+}$  imaging of animals expressing the calcium indicator GCaMP6s in the enteric muscles (EM::GCaMP6s, **Figure 5B**) (Li *et al.*, 2023). Similar to activation dynamics in DVB neuron, enteric muscles displayed rhythmic  $\text{Ca}^{2+}$  spikes closely correlated with expulsion action (**Figure 5C, D**). In our experimental conditions, the EM  $\text{Ca}^{2+}$  spikes exhibited a frequency of  $6.4 \pm 0.5$  Hz/300s ( $n = 20$ ) in wild-type animals (**Figure 5E**), which was also eliminated in *nlp-40(tm4085)* mutant (**Supplementary Figure S2D-E**). In *twk-40* mutants, the periodicity of EM  $\text{Ca}^{2+}$  spikes was affected. Specifically, the EM  $\text{Ca}^{2+}$  frequency was significantly reduced in *twk-40(bln336, gf)* mutants ( $3.0 \pm 0.2$  Hz/300s,  $n = 20$ ), and increased to  $8.6 \pm 0.6$  Hz/300s ( $n = 20$ ) in *twk-40(hp834, lf)* mutants (**Figure 5E, F**), reminiscent of *twk-40*'s effects for DVB  $\text{Ca}^{2+}$  frequency. EM  $\text{Ca}^{2+}$  amplitudes, however, were unchanged in *twk-40(bln336, gf)* animals (**Figure 5G**), which differs from the reduction observed for DVB  $\text{Ca}^{2+}$  spike amplitudes. Given that no *twk-40* expression was observed in enteric muscles, we propose that the effects of *twk-40* mutations on the  $\text{Ca}^{2+}$  activity of enteric muscles are a consequence of the dysregulation of presynaptic DVB neurons.

290 To confirm this idea, we performed additional experiments by expressing wild-type  
TWK-40 in EM and DVB neurons, respectively. We found that the reduced EM Ca<sup>2+</sup>  
frequency in *twk-40(bln336, gf)* mutant was almost fully rescued by expressing TWK-  
40(WT) in DVB (*Ptwk-40*, *Punc-47* and *Pflp-10*), but not in enteric muscles (*Pexp-1*) or  
in D-motor neurons (*Punc-25s*) (**Figure 6A, B**). Consistently, the increased frequency of  
295 EM Ca<sup>2+</sup> spikes in *twk-40(hp834, lf)* mutants was also restored to wild-type by TWK-  
40(WT) expression in DVB neurons (**Figure 6C, D**). We also ectopically expressed the  
gain-of-function TWK-40(L159N) in *twk-40(hp834)* animals to inhibit DVB's activity  
and recorded the EM Ca<sup>2+</sup> spikes. Consistently, the frequency of EM Ca<sup>2+</sup> spikes was  
significantly diminished in this experiment. This inhibition was however not observed in  
300 animals expressing TWK-40(L159N) in the enteric muscles or D-motor neurons (**Figure  
6E, F**). Collectively, our experiments argue that *twk-40* regulates Ca<sup>2+</sup> activities of enteric  
muscles by modulating DVB activity.

#### ***TWK-40 hyperpolarizes the resting membrane potential of DVB neuron***

The functional inhibition of DVB neuron by *twk-40* is consistent with an inhibitory  
305 function of this potassium channel. To directly investigate the functional effect of *twk-40*,  
we dissected and recorded GFP-labeled DVB neurons *in vivo* in the whole-cell patch  
clamp configuration (Methods, **Figure 7A**). In wild-type animals, stable outward K<sup>+</sup>  
currents were recorded at stepwise holding voltages from -60 mV to +80 mV (Jiang et al.,  
2022; Xie et al., 2013). These currents were significantly diminished in *twk-40(hp834)*  
310 loss-of-function mutants (**Figure 7B, C**). Conversely, in *twk-40(bln336)* gain-of-function  
mutants, outward currents were dramatically increased (**Figure 7B, C**). Thus, these *in-*

*situ* neuronal recordings demonstrate that *twk-40* supports a functional K<sup>+</sup> current in DVB neuron.

Furthermore, the resting membrane potential of DVB was also analyzed. While  
315 wild-type DVB neurons had an RMP of  $-38.9 \pm 3.7$  mV ( $n = 6$ ), loss of *twk-40* depolarized the RMP to  $-22.1 \pm 2.9$  mV ( $n = 7$ ). Conversely, in *twk-40(bln336)* mutants, the RMP of DVB neuron was dramatically hyperpolarized to  $-63.1 \pm 5.8$  mV ( $n = 6$ ) (**Figure 7D, E**). Taken together, these results demonstrate that TWK-40 constitutes a K<sup>+</sup> channel that stabilizes the RMP of DVB neuron.

320 In summary, we show here that TWK-40 forms a *bona fide* potassium channel that cell-autonomously maintains the RMP of DVB neuron, and that *twk-40* is essential for the regulation of the rhythmic expulsion motor program (**Figure 7F**).

## Discussion

Potassium currents mediated by K<sub>2P</sub> channels are important modulators of neuronal  
325 activity in animal nervous systems. We show here that the previously uncharacterized K<sub>2P</sub> channel TWK-40 provides a prominent leak potassium current in the DVB motor neuron that regulates the rhythmic expulsion behaviour of *C. elegans*. We present genetic evidence that loss of *twk-40* suppresses the *exp* defects of *nlp-40* and *aex-2* mutants. Additional evidence from expression pattern analysis, behavioral rescue experiments, and  
330 real-time neuronal and muscular Ca<sup>2+</sup> imaging, reveal the substantial contribution of TWK-40 to rhythmic expulsion activity. Further proof collected by heterologous expression of TWK-40 (Meng *et al.*, 2022) and *in situ* whole-cell patch clamp recording, demonstrates that *twk-40* constitutes a K<sub>2P</sub>-like potassium-selective current. Our results thus identify a K<sub>2P</sub> channel TWK-40, through its influence on DVB neuron resting

335 membrane potential, plays a critical role in coordinating the expulsion rhythm and locomotion, shedding light on the intricate interplay between potassium channels and neural circuits in controlling complex motor programs in vivo. These findings suggest a broader significance of TWK-40/K<sub>2P</sub> in orchestrating multiple motor rhythms, providing insights into the molecular mechanisms underlying coordinated motor behaviors.

340 Circadian rhythms with 24-hour-long cycles like sleeping are well studied and are controlled by the expression fluctuation of clock genes, like *Per1*, *Per2*, and *Bmall* etc. (Lowrey and Takahashi, 2004). Ultradian rhythms (or episodic ultradian events) with diverse shorter periods ranging from milliseconds to hours, are ubiquitous and indispensable in many neuromuscular systems, such as heartbeat, respiration and  
345 peristalsis (Goh et al., 2019). These ultradian rhythms are generally considered to be generated by motor central pattern generators (CPG) (Marder and Bucher, 2001). The ultradian DMP rhythm in *C. elegans* however is a remarkable exception, as it is initiated by calcium oscillations in intestinal cells (Teramoto and Iwasaki, 2006). The DVB and AVL neurons, acting as a signaling bridge through NLP-40 and GABA pathways,  
350 transfer non-neuronal calcium oscillation from the intestine to enteric muscles to execute the expulsion action.

Genetic analysis initially highlighted critical ion channel genes for DVB activity, such as *unc-2* and *egl-19* that encode the  $\alpha 1$  subunits of P/Q- and L- type voltage-gated Ca<sup>2+</sup> channel, respectively (Wang and Sieburth, 2013), and *egl-36*, a Shaw-type (Kv3)  
355 voltage-dependent potassium channel subunit (Johnstone et al., 1997). However, the *in vivo* cellular mechanism of how these channels contribute to the behavior is still unknown. The recent descriptions of synchronized giant action potentials between AVL and DVB,



and of unusual compound action potentials in AVL, provide insights into how the rhythmic expulsion behaviour is generated at the cellular level. In particular, the negative  
360 potassium spikes in AVL are mediated by a repolarization-activated potassium channel EXP-2 (Jiang *et al.*, 2022). Yet, no ion channel had been associated so far with the rhythmic activity of DVB. Thus, this study identifies TWK-40 as a novel important electrical component for the regulation of the defecation motor program.

Among 47  $K_{2P}$  genes in the *C. elegans* genome (Bargmann, 1998), only few have  
365 been substantially investigated. Interestingly, nematode  $K_{2P}$  channels have been mostly studied using gain-of-function mutations identified in forward genetic screens. For instance, while *twk-18(gf)* mutants cause sluggish, uncoordinated movement (Kunkel *et al.*, 2000), *sup-9(gf)* mutants are hyperactive with a characteristic rubberband phenotype (de la Cruz *et al.*, 2014). Gain-of-function mutants of *unc-58* show significant deficits in  
370 locomotion, egg laying, development and aging (Kasap *et al.*, 2018; Salkoff *et al.*, 2005). Except for *twk-18*, we still lack a comprehensive understanding of the electrical properties of these channels *in vitro* and *in vivo*. The recent discovery of a universal activating mutation that promotes the gating of vertebrate and invertebrate  $K_{2P}$  channels has opened the way to more comprehensive manipulation of ion channel activity (Ben  
375 Soussia *et al.*, 2019). We used this strategy here to engineer a point mutation of TWK-40 L159N that achieved a substantial gain-of-function effect. First, we show in a related study that the currents conducted by TWK-40(L159N) channels exhibit ~5 fold increase compared to TWK-40(WT) when heterologously expressed in HEK293 cells (Meng *et al.*, 2022). Second, the resting membrane potential of DVB neurons was drastically  
380 hyperpolarized due to the increased outward  $K^+$  current. In this *twk-40(bln336)* gain-of-

function mutant, the neuronal  $\text{Ca}^{2+}$  oscillation frequency and amplitude were reduced, resulting in the significantly diminished expulsion frequency. Thus, our study not only identifies TWK-40 as a regulator of the expulsion rhythm and DVB RMP, but also provides insight into the electrical properties of this  $\text{K}_{2\text{P}}$  channel.

385 We also describe the impact of loss of *twk-40* on the expulsion behavior and DVB activity. In contrast to *gf* mutants, the resting membrane potential of DVB neuron was depolarized in *twk-40(lf)* mutant, and high  $\text{Ca}^{2+}$  oscillation activity was observed. Consequently, the expulsion number exhibited a moderate but significant increase in *twk-40(lf)* mutant. The fact that only few  $\text{K}_{2\text{P}}$  mutants with loss of function phenotypes have  
390 been identified in *C. elegans* may be due to functional redundancy between  $\text{K}_{2\text{P}}$  genes. *twk-7* is a notable exception as it exhibits hyperactive locomotion (Gottschling et al., 2017; Luersen et al., 2016). Interestingly, we have found that *twk-40(lf)* mutants also exhibit increased forward and backward body bends, as well as more frequent and prolonged reversals (Meng et al., 2022). A recent genetic study reported that loss of  
395 function *twk-40* could reverse the reduced body curvature of *C. elegans NALCN(lf)* mutants (Zhou et al., 2022). Thus, TWK-40 appears to be required for the regulation of multiple motor rhythms.

The slight outward-rectification of the *twk-40* dependent  $\text{K}^{+}$  currents in DVB neurons differs from the voltage-independent currents observed in recombinant TWK-40  
400 recorded in HEK293 cells (Meng et al., 2022). This could be due to endogenous regulatory subunits expressed in DVB neurons that modify the channel kinetics of TWK-40. Alternatively, TWK-40 could form heteromers with other  $\text{K}_{2\text{P}}$  subunits *in vivo*, resulting in heterodimers with different activation kinetics (Czirjak and Enyedi, 2002).

K<sub>2P</sub> channels can be modulated by a variety of biophysical parameters, such as pH,  
405 temperature, and mechanic forces (Enyedi and Czirjak, 2010). Certain K<sub>2P</sub> channels,  
including TASK-1/3, TREK-1, and TRESK, are activated by volatile general anesthetics  
at clinically relevant concentrations (Liu et al., 2004; Patel et al., 1999; Sirois et al., 2000),  
indicating a major class of drug target from these K<sub>2P</sub> channels. As a possible ortholog of  
human TASK-1/3, identification of the critical stimulator of TWK-40 in the future could  
410 promote the understanding of how the external environment and internal state affect  
motor rhythm.

## **Materials and Methods**

### ***C. elegans strains and transgenic lines***

The complete lists of constructs, transgenic lines and strains generated or acquired for  
415 this study are provided in the Supplementary Table 1 and Table 2. All *C. elegans* strains  
were cultured on standard Nematode Growth Medium (NGM) plates seeded with OP50,  
and maintained at 22 °C. Multiple extrachromosomal transgenic lines were generated for  
all rescue experiments and visually examined for consistency. One representative  
transgenic line was quantified and results shown in most experiments. Unless stated  
420 otherwise noted, the wild-type animal refers to the Bristol N2 strain. Only hermaphrodite  
worms were used for the experiments.

### ***Constructs and molecular biology***

All expression plasmids in this study were constructed by Three-Fragment Multisite  
Gateway (Invitrogen, Thermo Fisher Scientific, USA) (Magnani et al., 2006). Three-  
425 Fragment Multisite gateway system consists of three entry clones. Three entry clones  
comprising three PCR products (promoter, target gene, sl2-GFP or unc-54 3'UTR, in

name of slot 1, slot 2 and slot 3, respectively) were recombined into the pDEST-R4-R3 or pDEST-R4-R3-unc-54 3' UTR destination vectors by using standard LR recombination reactions to generate the expression clones.

430 All promoters used in this study were generated by PCR against a mixed-stage N2 *C. elegans* genomic DNA. Promoters include the 1.4 kb *Ptwk-40*, 1.2 kb *Punc-47*, 1.6 kb *Pflp-10*, 1.8 kb *Punc-25s*, 2.4 kb *Pexp-1* and 1.4 kb *Pges-1* genomic sequence upstream of the respective ATG start codon and were used to substitute for the *rab-3* fragment in standard BP reaction-generated entry clone A with the In-Fusion method, using  
435 ClonExpress® II One Step Cloning Kit (Vazyme, China).

To generate the entry clones slot 2 and slot 3, we used standard BP recombination reactions. An entry clone B contributing sequences of slot 2 in the expression plasmid contains sequence of a target gene, i.e., *twk-40*, GFP, or RFP. The “B” entry clones were constructed by the use of *pDONR*<sup>TM</sup> 221 donor vector (Invitrogen) through BP reactions.

440 All the DNA fragments used to construct entry clone B involved in this project were amplified by PCR with the primers containing attB1 and attB2 recombination sites. An entry clone “C” contributing sequences of slot 3 in the expression plasmids contains a sequence of *unc-54* 3' UTR, *sl2d*-GFP or *sl2d*-wCherry. The “C” entry clones were constructed by use of *pDONR-P2R-P3* donor vector through standard BP reactions. The  
445 corresponding PCR products with attB2R and attB3 sites were amplified by PCR.

For calcium imaging, constructs with genetic calcium sensor GCaMP6s were used for neuronal activity measurement. The GCaMP6s sequence (Chen et al., 2013) was codon-optimized for expression in *C. elegans*. The synthesized gene also contains three *C. elegans* introns and contain restriction enzyme sites to facilitate subsequent cloning. In

450 all constructs, GCaMP6s was fused in frame with a *C. elegans* codon-optimized wCherry at the C-terminus.

### ***Genetic mutants and transgenic arrays***

Loss-of-function allele *hp834* was generated by targeted CRISPR/Cas9 genome editing with a 7 bp deletion of the sequence (GTTCGAG, base 127-133) was introduced in the  
455 2nd exon of T28A8.1a. *twk-40(bln336)* was generated by CRISPR/Cas9 technology by mutating 1047-1048 base of T28A8.1a from CT to AA. Other genetic mutants used for constructing transgenic lines and compound mutants were obtained from the *Caenorhabditis Genetics Center (CGC)*. Transgenic animals that carry non-integrated, extra-chromosomal arrays (*gaaEx*) were generated by co-injecting an injection marker  
460 with one to multiple DNA construct at 5-30 ng/ $\mu$ l. All animals were backcrossed at least four times against N2 prior to analyses.

### ***Behavioral assay for the defecation motor program***

Defecation behavior was measured on NGM plates under standard conditions as previously described (Thomas, 1990). All behavioral tests were performed at 20-22°C.  
465 Worms were synchronized and well-fed young hermaphrodites adults were transferred to fresh NGM plates with OP50 for behavior assay during freely-moving state. The defecation phenotypes were scored under a stereo fluorescence microscope (Zeiss V16, Germany). Each animal was quantified in 10 minutes after the first pBoc step pass using the Etho program software (Liu and Thomas, 1994). We simplified the observation on the  
470 pBoc and the Exp steps, due to the ambiguous aBoc step (Iwasaki and Thomas, 1997). Exp/cycle was calculated as the ratio of the number of Exp/pBoc during a 10 min recording (Wang *et al.*, 2013).

### ***Fluorescence Microscopy***

Images of fluorescently tagged proteins were captured in live L4 worms. L4 stage  
475 transgenic animals expressing fluorescence markers were picked a day before imaging.  
Worms were immobilized by 2.5 mM levamisole (Sigma-Aldrich, USA) in M9 buffer.  
Fluorescence signals were captured from live worms using a Plan-Apochromatic 60X  
objective on a confocal microscope (FV3000, Olympus, Japan) in the same conditions.

### ***Calcium imaging***

480 The two integrated strains *hpls468* (*Punc-47::GCaMP6s::wCherry*) and *hpls582* (*Pexp-  
I::GCaMP6s::wCherry*) were used for calcium imaging of DVB neuron and enteric  
muscles, respectively. Under standard OP50 feeding, two strains exhibit normal  
defecation interval and Exp step. To simplify the experiment, young hermaphrodite adult  
animals were glued dorsally as described previously (Gao et al., 2015), and imaged with a  
485 60x water objective (Nikon, Japan, numerical aperture = 1.0) (Li *et al.*, 2023). In  
particular, animals are loosely immobilized with WormGlu (Histoacryl Blue, Braun,  
Germany) to a sylgard-coated cover glass covered with bath-solution (Sylgard 184,  
Dowcorning, USA) but leave the tail free in the recording solution. To keep the worms'  
regular pumping and defecation activities, a small amount of OP50 (~100  $\mu$ l, OD600 = 1)  
490 was mixed into the recording solution, which consists of (in mM): NaCl 150; KCl 5;  
CaCl<sub>2</sub> 5; MgCl<sub>2</sub> 1; glucose 10; sucrose 5; HEPES 15, pH7.3 with NaOH, ~330 mOsm.

Fluorescence images were acquired with excitation wavelength LED at 470 nm  
(LED, BioLED Light Source Control Module 9-24V DC) and a digital sCMOS camera  
(Hamamatsu ORCA-Flash 4.0 V2) at 100 ms per frame for 3 minute. Data was collected  
495 from HImage (Hamamatsu) and analyzed by Image Pro Plus 6.0 (Media Cybernetics,

Inc., Rockville, MD, USA) and Image J (National Institutes of Health). The GCaMP6s fluorescence intensity of the region of interest (ROI) was defined as  $F$ , the background intensity near the ROI was defined as  $F_0$ . The true neuronal calcium fluorescence signal was obtained by subtracting the background signal from the ROI.  $\Delta F/F_0 = (F-F_0)/F_0$  was plotted over time as a fluorescence variation curve.

### ***In situ electrophysiology***

Dissection and recording were carried out using protocols and solutions described in the previous studies (Gao and Zhen, 2011; Richmond and Jorgensen, 1999). Briefly, 1- or 2-day-old hermaphrodite adults were glued (Histoacryl Blue, Braun, Germany) to a sylgard-coated cover glass covered with bath solution (Sylgard 184, Dowcorning, USA) under stereoscopic microscope M50 (Leica, Germany). After clearing the viscera by suction through a glass pipette, the tail cuticle flap was turned and gently glued down using WORMGLU (GluStitch Inc., Canada) to expose the DVB soma from *gaaEx0112* [*Punc-47::GFP::3'UTR*; *Pmyo-2::GFP*]. The integrity of the ventral nerve cord and DVB neuron were visually examined via DIC microscopy (Eclipse FN1, Nikon, Japan), and DVB soma were patched using 15-20 M $\Omega$ -resistant borosilicate pipettes (1B100F-4, World Precision Instruments, USA). Pipettes were pulled by micropipette puller P-1000 (Sutter, USA), and fire-polished by microforge MF-830 (Narishige, Japan). Membrane potentials and currents were recorded in the whole-cell configuration by EPC9 amplifier (HEKA, Germany), and analyzed using the Igor Pro (WaveMetrics, USA) and Clampfit 10 software (Axon Instruments, Molecular Devices, USA). Membrane potential was recorded at 0 pA, I-V curve was collected at holding potential from -60 mV to +80 mV at 20 mV increment. Data were digitized at 10-20 kHz and filtered at 2.6 kHz. The pipette

solution contains (in mM): K-gluconate 115; KCl 25; CaCl<sub>2</sub> 0.1; MgCl<sub>2</sub> 5; BAPTA 1;  
520 HEPES 10; Na<sub>2</sub>ATP 5; Na<sub>2</sub>GTP 0.5; cAMP 0.5; cGMP 0.5, pH7.2 with KOH, ~320  
mOsm. cAMP and cGMP were included to maintain the activity and longevity of the  
preparation. The bath solution consists of (in mM): NaCl 150; KCl 5; CaCl<sub>2</sub> 5; MgCl<sub>2</sub> 1;  
glucose 10; sucrose 5; HEPES 15, pH7.3 with NaOH, ~330 mOsm. Chemicals were  
obtained from Sigma unless stated otherwise. Experiments were performed at room  
525 temperatures (20-22 °C).

### ***Statistical analysis***

The two-tailed Student's *t*-test were used to compare two groups data sets. When multiple  
groups (more than two groups) of data were compared, ordinary one-way or two-way  
ANOVA analysis was performed for statistical analysis. The Shapiro-Wilk test was used  
530 to check for normality and either Levene's test to check for equal variance.  $P < 0.05$  was  
considered to be statistically significant; \*, \*\*, \*\*\* and \*\*\*\* denote  $P < 0.05$ ,  $P < 0.01$ ,  $P$   
 $< 0.001$ ,  $P < 0.0001$ , respectively. Graphing and subsequent analysis were performed  
using Igor Pro (WaveMetrics), Clampfit (Molecular Devices), Image J (National  
Institutes of Health), Python, Matlab (MathWorks, USA), GraphPad Prism 8 (GraphPad  
535 Software Inc., USA) and Excel (Microsoft, USA). For behavior analysis, calcium  
imaging, electrophysiology and fluorescence imaging, each recording trace was obtained  
from a different animal. Unless specified otherwise, data were presented as the mean  $\pm$   
SEM.

### **Author Contributions**

540 S.G. conceived experiments and wrote the manuscript. Z.Y., B.Y., Y.L., and Y.X.  
performed experiments and analyzed data. L.C., J.C. J.M., W.H., Y.T., S.E.M., and C.Z.



contributed to the experiments. T.B. and M.Z. provided reagents, discussed the experiments and edited the text.

### **Acknowledgements**

545 We thank Chenhong Li, Long Ma for discussion. This research was supported by the Major International (Regional) Joint Research Project (32020103007), the National Natural Science Foundation of China (32371189, 31871069), the National Key Research and Development Program of China (2022YFA1206001), the Overseas High-level Talents Introduction Program, and the European Research Council (TB, ERC Starting Grant, Kelegans). We thank *Caenorhabditis Genetics Center*, which is funded by the NIH Office of Research Infrastructure Programs (P40 OD010440), for strains.

### **Declaration of Interests**

The authors declare no conflict of interest.

## References

- 555 Bargmann, C.I. (1998). Neurobiology of the *Caenorhabditis elegans* genome. *Science* 282, 2028-2033. [10.1126/science.282.5396.2028](https://doi.org/10.1126/science.282.5396.2028).
- Beg, A.A., and Jorgensen, E.M. (2003). EXP-1 is an excitatory GABA-gated cation channel. *Nat Neurosci* 6, 1145-1152. [10.1038/nn1136](https://doi.org/10.1038/nn1136).
- 560 Ben Soussia, I., El Mouridi, S., Kang, D., Leclercq-Blondel, A., Khoubza, L., Tardy, P., Zariohi, N., Gendrel, M., Lesage, F., Kim, E.J., et al. (2019). Mutation of a single residue promotes gating of vertebrate and invertebrate two-pore domain potassium channels. *Nat Commun* 10, 787. [10.1038/s41467-019-08710-3](https://doi.org/10.1038/s41467-019-08710-3).
- Branicky, R., and Hekimi, S. (2006). What keeps *C. elegans* regular: the genetics of defecation. *Trends Genet* 22, 571-579. [10.1016/j.tig.2006.08.006](https://doi.org/10.1016/j.tig.2006.08.006).
- 565 Brose, N., Hofmann, K., Hata, Y., and Sudhof, T.C. (1995). Mammalian homologues of *Caenorhabditis elegans* unc-13 gene define novel family of C2-domain proteins. *J Biol Chem* 270, 25273-25280. [10.1074/jbc.270.42.25273](https://doi.org/10.1074/jbc.270.42.25273).
- Buckingham, S.D., Kidd, J.F., Law, R.J., Franks, C.J., and Sattelle, D.B. (2005). Structure and function of two-pore-domain K<sup>+</sup> channels: contributions from genetic model organisms. *Trends Pharmacol Sci* 26, 361-367. [10.1016/j.tips.2005.05.003](https://doi.org/10.1016/j.tips.2005.05.003).
- 570 Chen, T.W., Wardill, T.J., Sun, Y., Pulver, S.R., Renninger, S.L., Baohan, A., Schreiter, E.R., Kerr, R.A., Orger, M.B., Jayaraman, V., et al. (2013). Ultrasensitive fluorescent proteins for imaging neuronal activity. *Nature* 499, 295-300. [10.1038/nature12354](https://doi.org/10.1038/nature12354).
- 575 Choi, U., Wang, H., Hu, M., Kim, S., and Sieburth, D. (2021). Presynaptic coupling by electrical synapses coordinates a rhythmic behavior by synchronizing the activities of a neuron pair. *Proceedings of the National Academy of Sciences* 118, e2022599118.
- 580 Cook, S.J., Jarrell, T.A., Brittin, C.A., Wang, Y., Bloniarz, A.E., Yakovlev, M.A., Nguyen, K.C.Q., Tang, L.T., Bayer, E.A., Duerr, J.S., et al. (2019). Whole-animal connectomes of both *Caenorhabditis elegans* sexes. *Nature* 571, 63-71. [10.1038/s41586-019-1352-7](https://doi.org/10.1038/s41586-019-1352-7).
- Czirjak, G., and Enyedi, P. (2002). Formation of functional heterodimers between the TASK-1 and TASK-3 two-pore domain potassium channel subunits. *J Biol Chem* 277, 5426-5432. [10.1074/jbc.M107138200](https://doi.org/10.1074/jbc.M107138200).
- 585 Dal Santo, P., Logan, M.A., Chisholm, A.D., and Jorgensen, E.M. (1999). The inositol trisphosphate receptor regulates a 50-second behavioral rhythm in *C. elegans*. *Cell* 98, 757-767. [10.1016/s0092-8674\(00\)81510-x](https://doi.org/10.1016/s0092-8674(00)81510-x).
- de la Cruz, I.P., Ma, L., and Horvitz, H.R. (2014). The *Caenorhabditis elegans* iodotyrosine deiodinase ortholog SUP-18 functions through a conserved channel SC-box

- 590 to regulate the muscle two-pore domain potassium channel SUP-9. *PLoS Genet* *10*,  
e1004175. 10.1371/journal.pgen.1004175.
- Enyedi, P., and Czirjak, G. (2010). Molecular background of leak K<sup>+</sup> currents: two-pore domain potassium channels. *Physiol Rev* *90*, 559-605. 10.1152/physrev.00029.2009.
- 595 Gao, S., Xie, L., Kawano, T., Po, M.D., Guan, S., Zhen, M., Pirri, J.K., and Alkema, M.J. (2015). The NCA sodium leak channel is required for persistent motor circuit activity that sustains locomotion. *Nat Commun* *6*, 6323. 10.1038/ncomms7323.
- Gao, S., and Zhen, M. (2011). Action potentials drive body wall muscle contractions in *Caenorhabditis elegans*. *Proc Natl Acad Sci U S A* *108*, 2557-2562. 10.1073/pnas.1012346108.
- 600 Goh, G.H., Maloney, S.K., Mark, P.J., and Blache, D. (2019). Episodic Ultradian Events-Ultradian Rhythms. *Biology (Basel)* *8*. 10.3390/biology8010015.
- Goldstein, S.A., Bayliss, D.A., Kim, D., Lesage, F., Plant, L.D., and Rajan, S. (2005). International Union of Pharmacology. LV. Nomenclature and molecular relationships of two-P potassium channels. *Pharmacol Rev* *57*, 527-540. 10.1124/pr.57.4.12.
- 605 Gottschling, D.C., Doring, F., and Luersen, K. (2017). Locomotion Behavior Is Affected by the GalphaS Pathway and the Two-Pore-Domain K(+) Channel TWK-7 Interacting in GABAergic Motor Neurons in *Caenorhabditis elegans*. *Genetics* *206*, 283-297. 10.1534/genetics.116.195669.
- 610 Graham, J.M., Jr., Zadeh, N., Kelley, M., Tan, E.S., Liew, W., Tan, V., Deardorff, M.A., Wilson, G.N., Sagi-Dain, L., and Shalev, S.A. (2016). KCNK9 imprinting syndrome-further delineation of a possible treatable disorder. *Am J Med Genet A* *170*, 2632-2637. 10.1002/ajmg.a.37740.
- Iwasaki, K., and Thomas, J.H. (1997). Genetics in rhythm. *Trends in genetics* *13*, 111-115.
- 615 Jiang, J., Su, Y., Zhang, R., Li, H., Tao, L., and Liu, Q. (2022). *C. elegans* enteric motor neurons fire synchronized action potentials underlying the defecation motor program. *Nature communications* *13*, 1-15.
- Jin, Y., Jorgensen, E., Hartweg, E., and Horvitz, H.R. (1999). The *Caenorhabditis elegans* gene *unc-25* encodes glutamic acid decarboxylase and is required for synaptic transmission but not synaptic development. *Journal of Neuroscience* *19*, 539-548.
- 620 Johnstone, D.B., Wei, A., Butler, A., Salkoff, L., and Thomas, J.H. (1997). Behavioral defects in *C. elegans* *egl-36* mutants result from potassium channels shifted in voltage-dependence of activation. *Neuron* *19*, 151-164. 10.1016/s0896-6273(00)80355-4.
- Kasap, M., Weeks, K., Aamodt, E.J., and Dwyer, D.S. (2018). Gain-of-function mutations in a two-pore domain K<sup>+</sup> channel(*unc-58*) cause developmental, motor and feeding

- 625 defects in *C. elegans* modified by temperature and a channel inhibitor, loratadine. *Curr Neurobiol* 9, 84-91.
- Kunkel, M.T., Johnstone, D.B., Thomas, J.H., and Salkoff, L. (2000). Mutants of a temperature-sensitive two-P domain potassium channel. *J Neurosci* 20, 7517-7524.
- 630 Lalevee, N., Monier, B., Senatore, S., Perrin, L., and Semeriva, M. (2006). Control of cardiac rhythm by ORK1, a *Drosophila* two-pore domain potassium channel. *Curr Biol* 16, 1502-1508. 10.1016/j.cub.2006.05.064.
- LeBoeuf, B., and Garcia, L.R. (2017). *Caenorhabditis elegans* Male Copulation Circuitry Incorporates Sex-Shared Defecation Components To Promote Intromission and Sperm Transfer. *G3 (Bethesda)* 7, 647-662. 10.1534/g3.116.036756.
- 635 Lee, J., Song, H.O., Jee, C., Vanoaica, L., and Ahnn, J. (2005). Calcineurin regulates enteric muscle contraction through EXP-1, excitatory GABA-gated channel, in *C. elegans*. *J Mol Biol* 352, 313-318. 10.1016/j.jmb.2005.07.032.
- Lesage, F., and Lazdunski, M. (2000). Molecular and functional properties of two-pore-domain potassium channels. *Am J Physiol Renal Physiol* 279, F793-801.
- 640 10.1152/ajprenal.2000.279.5.F793.
- Li, Y., Chitturi, J., Yu, B., Zhang, Y., Wu, J., Ti, P., Hung, W., Zhen, M., and Gao, S. (2023). UBR-1 ubiquitin ligase regulates the balance between GABAergic and glutamatergic signaling. *EMBO Rep* 24, e57014. 10.15252/embr.202357014.
- 645 Liu, C., Au, J.D., Zou, H.L., Cotten, J.F., and Yost, C.S. (2004). Potent activation of the human tandem pore domain K channel TRESK with clinical concentrations of volatile anesthetics. *Anesth Analg* 99, 1715-1722. 10.1213/01.ANE.0000136849.07384.44.
- Liu, D.W., and Thomas, J.H. (1994). Regulation of a periodic motor program in *C. elegans*. *The Journal of neuroscience : the official journal of the Society for Neuroscience* 14, 1953-1962. 10.1523/jneurosci.14-04-01953.1994.
- 650 Lowrey, P.L., and Takahashi, J.S. (2004). Mammalian circadian biology: elucidating genome-wide levels of temporal organization. *Annu Rev Genomics Hum Genet* 5, 407-441. 10.1146/annurev.genom.5.061903.175925.
- 655 Luersen, K., Gottschling, D.C., and Doring, F. (2016). Complex Locomotion Behavior Changes Are Induced in *Caenorhabditis elegans* by the Lack of the Regulatory Leak K<sup>+</sup> Channel TWK-7. *Genetics* 204, 683-701. 10.1534/genetics.116.188896.
- Magnani, E., Bartling, L., and Hake, S. (2006). From Gateway to MultiSite Gateway in one recombination event. *BMC Mol Biol* 7, 46. 10.1186/1471-2199-7-46.
- Mahoney, T.R., Luo, S., Round, E.K., Brauner, M., Gottschalk, A., Thomas, J.H., and Nonet, M.L. (2008). Intestinal signaling to GABAergic neurons regulates a rhythmic

- 660 behavior in *Caenorhabditis elegans*. *Proc Natl Acad Sci U S A* *105*, 16350-16355.  
10.1073/pnas.0803617105.
- Marder, E., and Bucher, D. (2001). Central pattern generators and the control of rhythmic movements. *Curr Biol* *11*, R986-996. 10.1016/s0960-9822(01)00581-4.
- Marder, E., and Calabrese, R.L. (1996). Principles of rhythmic motor pattern generation. 665 *Physiol Rev* *76*, 687-717. 10.1152/physrev.1996.76.3.687.
- McIntire, S.L., Jorgensen, E., and Horvitz, H.R. (1993a). Genes required for GABA function in *Caenorhabditis elegans*. *Nature* *364*, 334-337. 10.1038/364334a0.
- McIntire, S.L., Jorgensen, E., Kaplan, J., and Horvitz, H.R. (1993b). The GABAergic nervous system of *Caenorhabditis elegans*. *Nature* *364*, 337-341. 10.1038/364337a0.
- 670 Meng, J., Ahamed, T., Yu, B., Huang, W., Mouridi, S., Leclercq-Blondel, A., Gendrel, M., Wang, Z., Chen, L., and Quan, W., et al. (2022). A descending interneuron with depolarized resting membrane potential controls *C. elegans* motor states. bioRxiv.
- Nehrke, K., Denton, J., and Mowrey, W. (2008). Intestinal Ca<sup>2+</sup> wave dynamics in freely moving *C. elegans* coordinate execution of a rhythmic motor program. 675 *Am J Physiol Cell Physiol* *294*, C333-344. 10.1152/ajpcell.00303.2007.
- Patel, A.J., Honore, E., Lesage, F., Fink, M., Romey, G., and Lazdunski, M. (1999). Inhalational anesthetics activate two-pore-domain background K<sup>+</sup> channels. *Nat Neurosci* *2*, 422-426. 10.1038/8084.
- Richmond, J.E., and Jorgensen, E.M. (1999). One GABA and two acetylcholine receptors 680 function at the *C. elegans* neuromuscular junction. *Nat Neurosci* *2*, 791-797. 10.1038/12160.
- Salkoff, L., Butler, A., Fawcett, G., Kunkel, M., McArdle, C., Paz-y-Mino, G., Nonet, M., Walton, N., Wang, Z.W., Yuan, A., and Wei, A. (2001). Evolution tunes the excitability of individual neurons. *Neuroscience* *103*, 853-859. 10.1016/s0306- 685 4522(01)00079-3.
- Salkoff, L., Wei, A.D., Baban, B., Butler, A., Fawcett, G., Ferreira, G., and Santi, C.M. (2005). Potassium channels in *C. elegans*. *WormBook*, 1-15. 10.1895/wormbook.1.42.1.
- Sirois, J.E., Lei, Q., Talley, E.M., Lynch, C., 3rd, and Bayliss, D.A. (2000). The TASK-1 two-pore domain K<sup>+</sup> channel is a molecular substrate for neuronal effects of inhalation 690 anesthetics. *J Neurosci* *20*, 6347-6354.
- Teramoto, T., and Iwasaki, K. (2006). Intestinal calcium waves coordinate a behavioral motor program in *C. elegans*. *Cell Calcium* *40*, 319-327. 10.1016/j.ceca.2006.04.009.
- Thomas, J.H. (1990). Genetic analysis of defecation in *Caenorhabditis elegans*. *Genetics* *124*, 855-872.

- 695 Wang, H., Girskis, K., Janssen, T., Chan, J.P., Dasgupta, K., Knowles, J.A., Schoofs, L.,  
and Sieburth, D. (2013). Neuropeptide secreted from a pacemaker activates neurons to  
control a rhythmic behavior. *Current biology : CB* 23, 746-754.  
10.1016/j.cub.2013.03.049.
- 700 Wang, H., and Sieburth, D. (2013). PKA controls calcium influx into motor neurons  
during a rhythmic behavior. *PLoS genetics* 9, e1003831. 10.1371/journal.pgen.1003831.
- Wang, Z.W., Kunkel, M.T., Wei, A., Butler, A., and Salkoff, L. (1999). Genomic  
organization of nematode 4TM K<sup>+</sup> channels. *Ann N Y Acad Sci* 868, 286-303.  
10.1111/j.1749-6632.1999.tb11294.x.
- 705 White, J.G., Southgate, E., Thomson, J.N., and Brenner, S. (1986). The structure of the  
nervous system of the nematode *Caenorhabditis elegans*. *Philosophical Transactions of  
the Royal Society B: Biological Sciences* 314, 1-340.
- Witvliet, D., Mulcahy, B., Mitchell, J.K., Meirovitch, Y., Berger, D.R., Wu, Y., Liu, Y.,  
Koh, W.X., Parvathala, R., Holmyard, D., et al. (2021). Connectomes across development  
710 reveal principles of brain maturation. *Nature* 596, 257-261. 10.1038/s41586-021-03778-  
8.
- Xie, L., Gao, S., Alcaire, S.M., Aoyagi, K., Wang, Y., Griffin, J.K., Stagljar, I.,  
Nagamatsu, S., and Zhen, M. (2013). NLF-1 delivers a sodium leak channel to regulate  
neuronal excitability and modulate rhythmic locomotion. *Neuron* 77, 1069-1082.  
10.1016/j.neuron.2013.01.018.
- 715 Zhou, C., Zhou, Q., He, X., He, Y., Wang, X., Zhu, X., Zhang, Y., and Ma, L. (2022).  
Differential modulation of *C. elegans* motor behavior by NALCN and two-pore domain  
potassium channels. *PLoS Genet* 18, e1010126. 10.1371/journal.pgen.1010126.

720

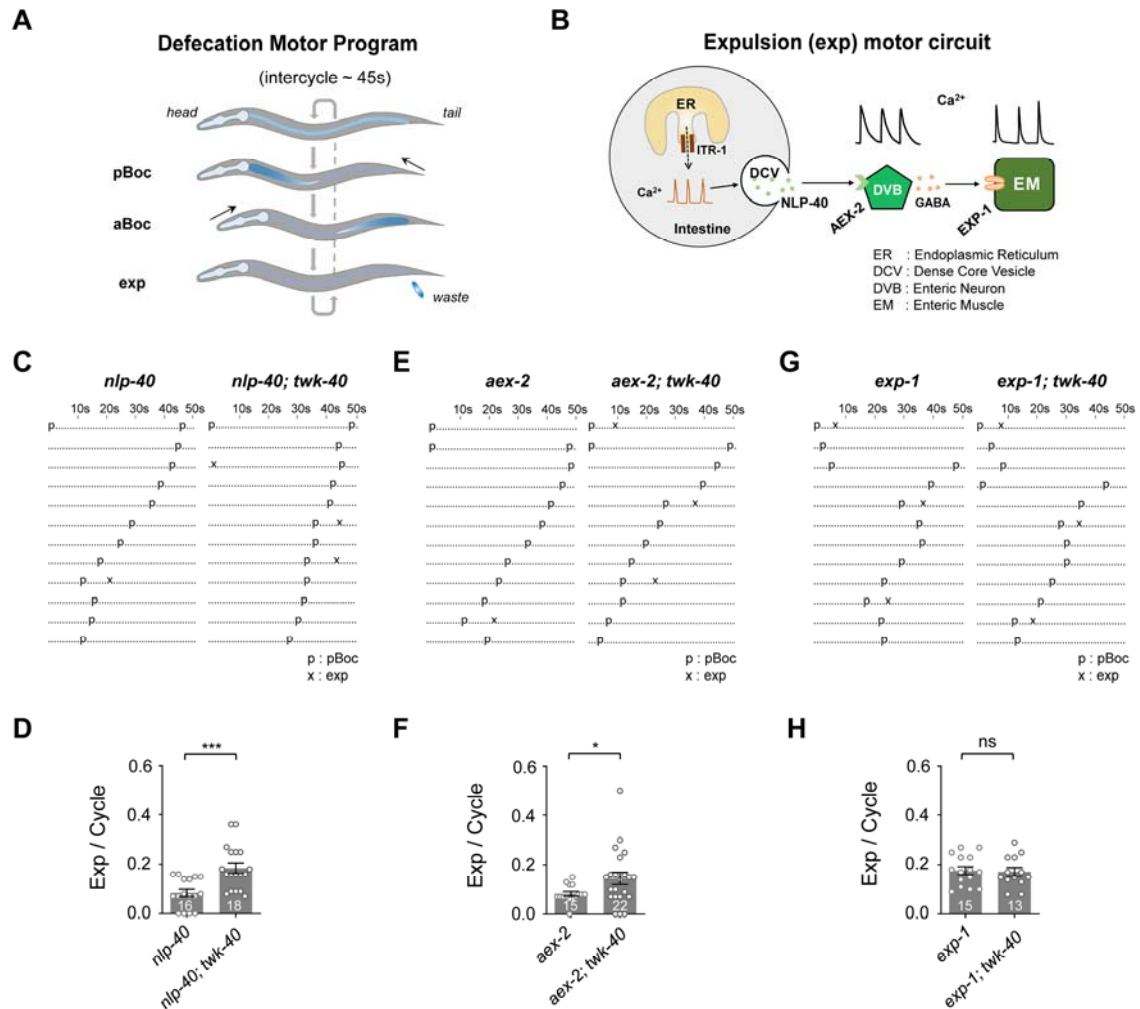

**Figure 1. Loss of function of *twk-40* suppresses expulsion defects in *nlp-40* and *aex-2* mutants**

(A) Schematic representation of the defecation motor program (DMP), which consists of  
725 three distinct sets of muscle contractions: the posterior body muscle contraction (pBoc),  
the anterior body muscle contraction (aBoc), and the expulsion muscle contraction (exp  
or EMC). The regular defecation cycle period is approximately 45 sec. (B) Schematic  
representation of the expulsion motor circuit, including the intestine, DVB neuron and  
enteric muscles (EM). ER, endoplasmic reticulum; ITR-1, inositol 1,4,5-trisphosphate  
730 receptor; DCV: dense core vesicle. (C, E, G) Ethograms of defecation behavior in *nlp-40*

and *nlp-40*; *twk-40* double mutants, *aex-2* and *aex-2*; *twk-40* double mutants, and *exp-1* and *exp-1*; *twk-40* double mutants, respectively. Each dot and character represent 1 s.

Letters ‘p’ and ‘x’ represent pBoc and exp, respectively. **(D, F, H)** Quantifications of the expulsion frequency per defecation cycle. The expulsion deficiency was partially

735 recovered by loss of *twk-40* in *nlp-40* and *aex-2* mutants, but not in *exp-1* mutants. All data are expressed as means  $\pm$  SEM. Student’s *t*-test was used. Statistical significance is indicated as follows: ns, not significant, \* $P < 0.05$ , \*\*\* $P < 0.001$  in comparison with that as denoted.



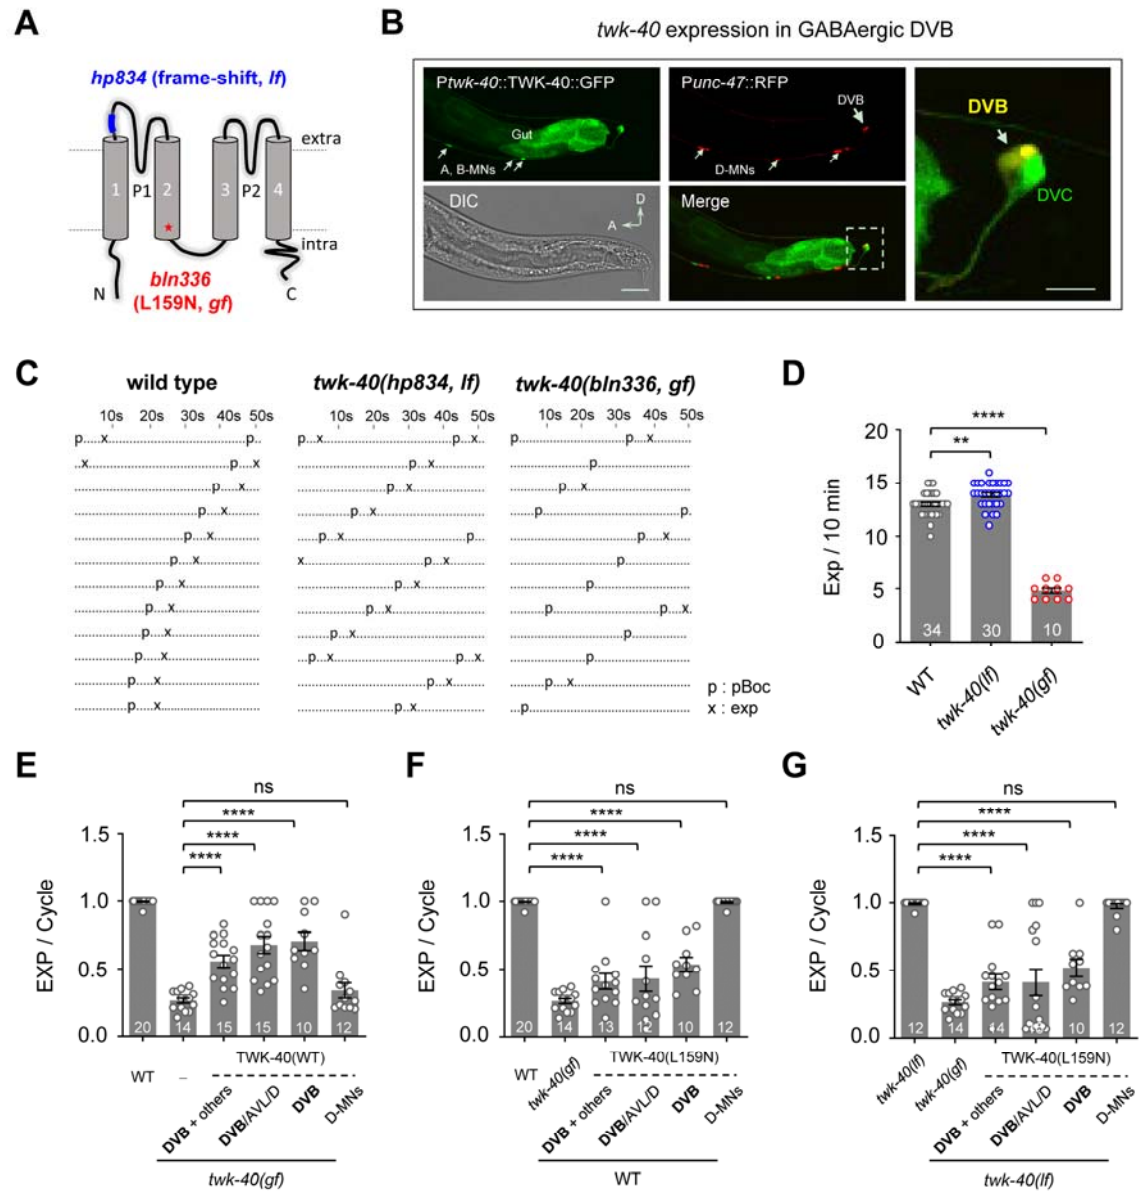

740 **Figure 2. *twk-40* regulates expulsion rhythm from DVB neuron**

(A) Diagram of the TWK-40 K<sup>+</sup> channel and the mutation loci. P1 and P2, pore domains;

1-4 transmembrane domains; *fs*, predicted frameshift mutation; *gf*, gain-of-function

mutation. (B) *twk-40* is expressed in DVB based on co-localization of P*twk-40*::TWK-40::sl2dGFP and P*punc-47*::RFP. GFP was observed in the ventral excitatory motor

745 neurons, a few head and tail neurons, and the intestine. Scale bar, 20 μm. *Right*, zoomed

view of *twk-40* expression in DVB and DVC. Scale bar, 5  $\mu$ m. (C) Ethograms of defecation behavior in wild type, *twk-40(bln336, gf)* and *twk-40(hp834, lf)* animals. Each dot and character represent 1 s. Letters ‘p’ and ‘x’ represent pBoc and exp, respectively. (D) Quantifications of the expulsion frequency per defecation cycle. Compared to wild-  
750 type animals, the expulsion deficiency was significantly reduced in *twk-40(bln336, gf)*, but not in *twk-40(hp834, lf)*. (E) Neuronal expression of wild-type TWK-40 (TWK-40(WT)) in DVB neurons rescues the expulsion deficiency of *twk-40(bln336, gf)* mutants. (F, G) Neuronal expression of gain-of-function TWK-40(L159N) in DVB in wild type (F) or *twk-40(hp834)* (G) recapitulates the expulsion deficiency of *twk-40(gf)* mutant. The  
755 number of tested animals is indicated for each strain. All data are expressed as means  $\pm$  SEM. One-way ANOVA test was used, in which: ns, not significant, \*\* $P < 0.01$ , \*\*\*\* $P < 0.0001$  relative to wild type or as indicated.

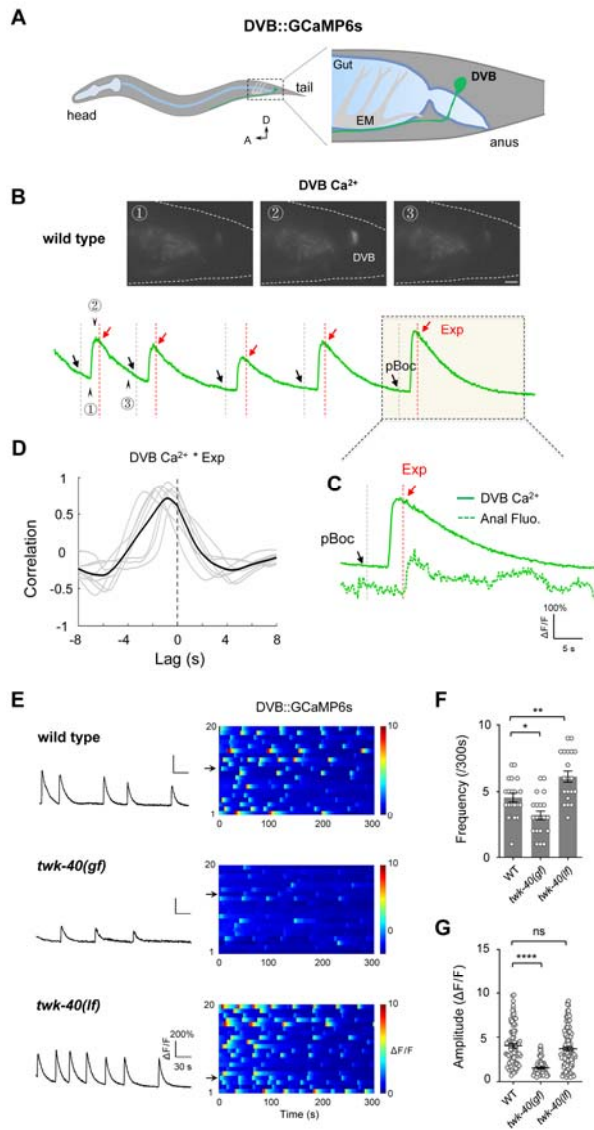

**Figure 3. *twk-40* inhibits DVB Ca<sup>2+</sup> oscillation**

760 (A) Schematic representation of *C. elegans* DVB neuron and enteric muscle (EM) in a lateral view. The genetically-encoded Ca<sup>2+</sup> indicator GCaMP6s was expressed in DVB to measure its neuronal activity. (B) Representative spontaneous Ca<sup>2+</sup> oscillation imaged by GCaMP in DVB neuron. *Upper*, from left to right, Ca<sup>2+</sup> signal of DVB in (1) the quiescent state, (2) at peak Ca<sup>2+</sup> signal and (3) upon return to the basal state. Scale bar, 5

765 μm. *Bottom*, representative recording of Ca<sup>2+</sup> oscillations in DVB over time. Arrow heads indicate the corresponding time points in upper panels. (C) Simultaneous recording of

DVB  $\text{Ca}^{2+}$  activity and expulsion action that observed by anal bacterial fluorescence. **(D)**

Cross-correlation between DVB  $\text{Ca}^{2+}$  and Exp. Faint lines indicate the results from individual  $\text{Ca}^{2+}$  transient, and the black line indicates mean value. Black dashed line

770 denotes tight correlation between DVB  $\text{Ca}^{2+}$  and Exp action with a  $\sim 0.8$  s delay. **(E)**

Representative  $\text{Ca}^{2+}$  activity (*left*) and color maps (*right*) of DVB neurons in wild type, *twk-40(bln336, gf)* and *twk-40(hp834, lf)* mutants, respectively. **(F, G)** Significant

reduction of  $\text{Ca}^{2+}$  transient frequency and amplitude in *twk-40(bln336, gf)* mutant, n=20.

Reduction of frequency but not amplitude in *twk-40(hp834, lf)* mutants. All data are

775 expressed as means  $\pm$  SEM. One-way ANOVA test was used, in which: ns, not

significant, \* $P < 0.05$ , \*\* $P < 0.01$ , \*\*\*\* $P < 0.0001$  in comparison with that as denoted.

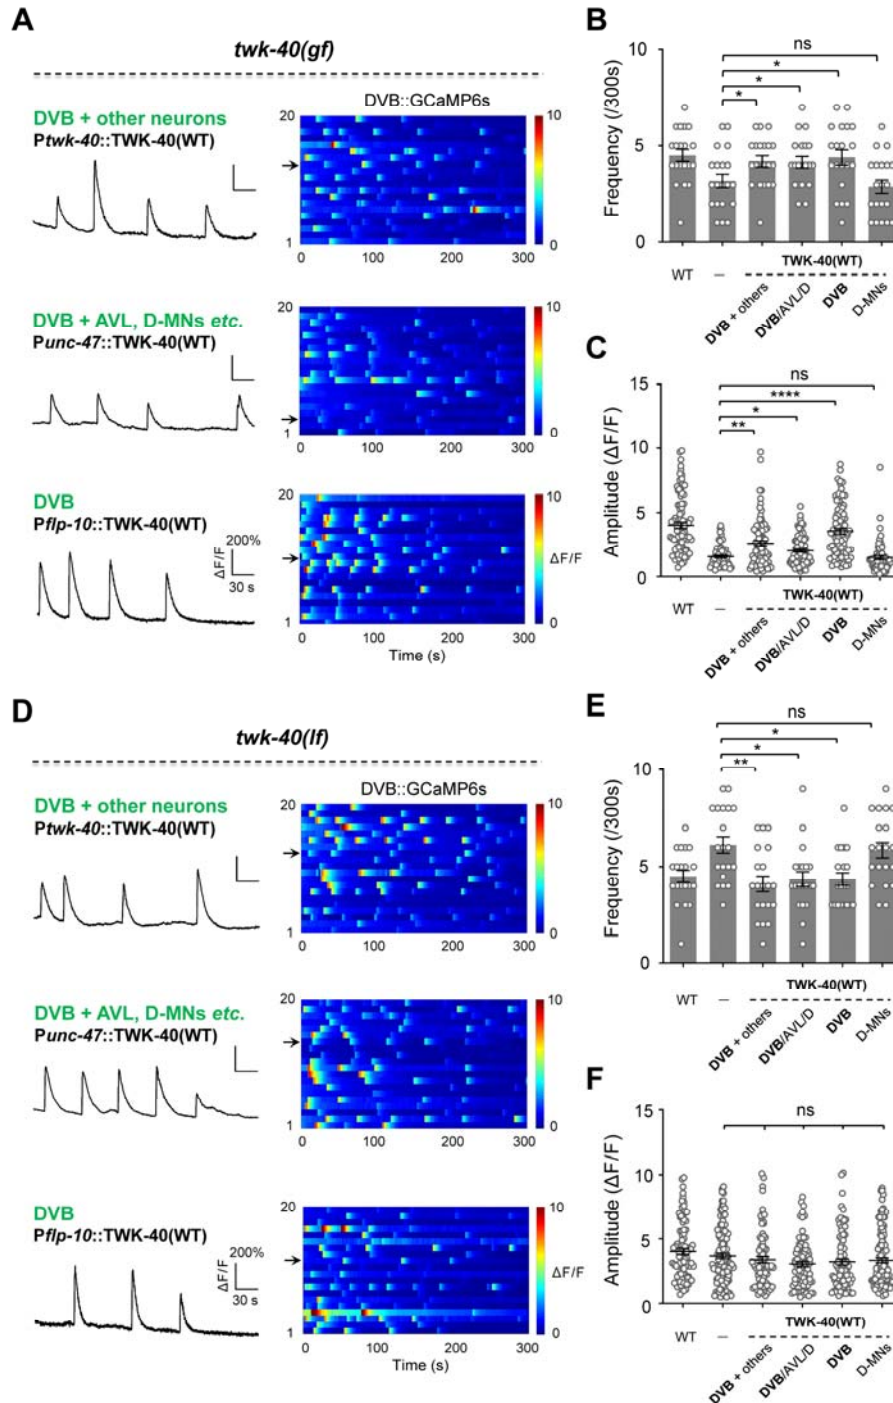

**Figure 4. *twk-40* regulates  $Ca^{2+}$  oscillation in DVB neuron**

(A) Representative DVB  $Ca^{2+}$  traces (*left*) and color maps (*right*) for tissue-specific  
 780 expression of TWK-40(WT) in *twk-40(bln336, gf)* mutants. *Upper*, endogenous promoter  
*Ptwk-40*; *middle*, *Punc-47* promoter including DVB expression; *bottom*, *Punc-25*

promoter lacking DVB expression. **(B, C)** Quantification of the frequency and amplitude of  $\text{Ca}^{2+}$  transients,  $n=20$ . **(D)** Representative DVB  $\text{Ca}^{2+}$  traces (*left*) and color maps (*right*) for tissue-specific expression of TWK-40(WT) in *twk-40(hp834, lf)* mutant. **(E, F)** Quantification of the frequency and amplitude of  $\text{Ca}^{2+}$  transients,  $n=20$  animals. All data are expressed as means  $\pm$  SEM. One-way ANOVA test was used, in which: ns, not significant,  $*P < 0.05$ ,  $**P < 0.01$ ,  $****P < 0.0001$  in comparison with that as denoted.

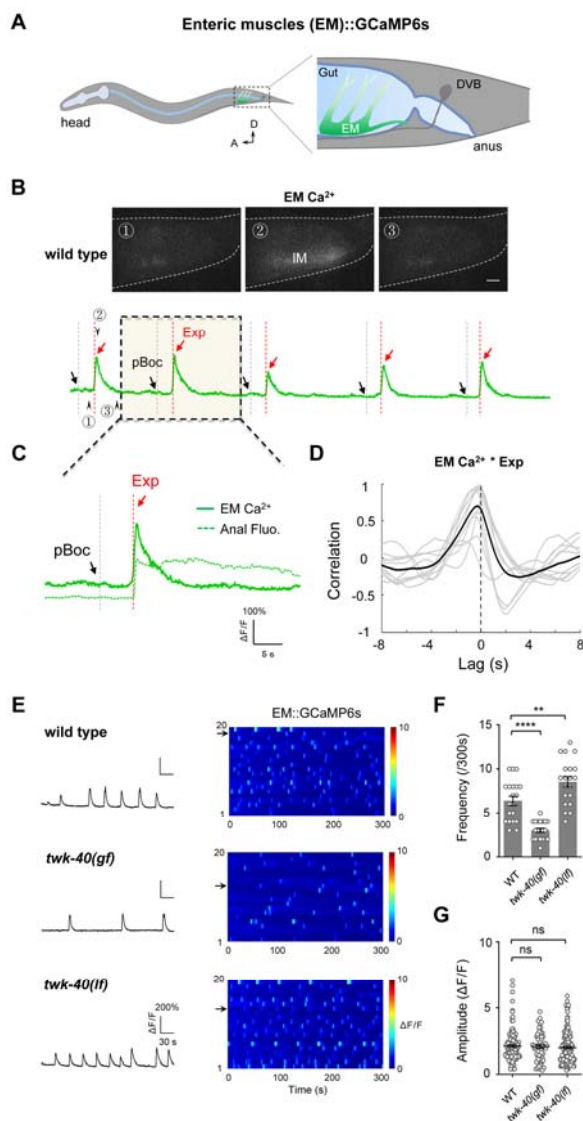

790 **Figure 5. *twk-40* mutants regulate  $\text{Ca}^{2+}$  dynamics of enteric muscles**

(A) *i.* Schematic representation of *C. elegans* DVB neuron and enteric muscle (EM) in a lateral view. The genetically-encoded  $\text{Ca}^{2+}$  indicator GCaMP6s was expressed in EM. *ii.* Representative  $\text{Ca}^{2+}$  oscillation imaged by GCaMP in EM *in-vivo*. *Upper*, from left to right,  $\text{Ca}^{2+}$  signal of EM in (1) the quiescent state, (2) at peak  $\text{Ca}^{2+}$  signal and (3) upon return to the basal state. Scale bar, 5  $\mu\text{m}$ . *Bottom*, representative recording of  $\text{Ca}^{2+}$  oscillations in EM over time. Arrow heads indicate the corresponding time points in upper panels. Color map of the rhythmic EM  $\text{Ca}^{2+}$  activities in wild-type animals. (B) Representative  $\text{Ca}^{2+}$  activity (*left*) and color maps (*right*) of enteric muscles in *twk-40(bln336, gf)* and *twk-40(hp834, lf)* mutants, respectively. (C) Quantification of EM  $\text{Ca}^{2+}$  transients frequency and amplitude,  $n=20$ .  $\text{Ca}^{2+}$  transient frequency was significantly reduced in *twk-40(bln336, gf)* mutant, but was increased in *twk-40(hp834, lf)* mutant. EM  $\text{Ca}^{2+}$  amplitude was not altered in either mutants. All data are expressed as means  $\pm$  SEM. One-way ANOVA -test was used, in which: ns, not significant,  $**P < 0.05$ ,  $****P < 0.0001$  in comparison with that as denoted.

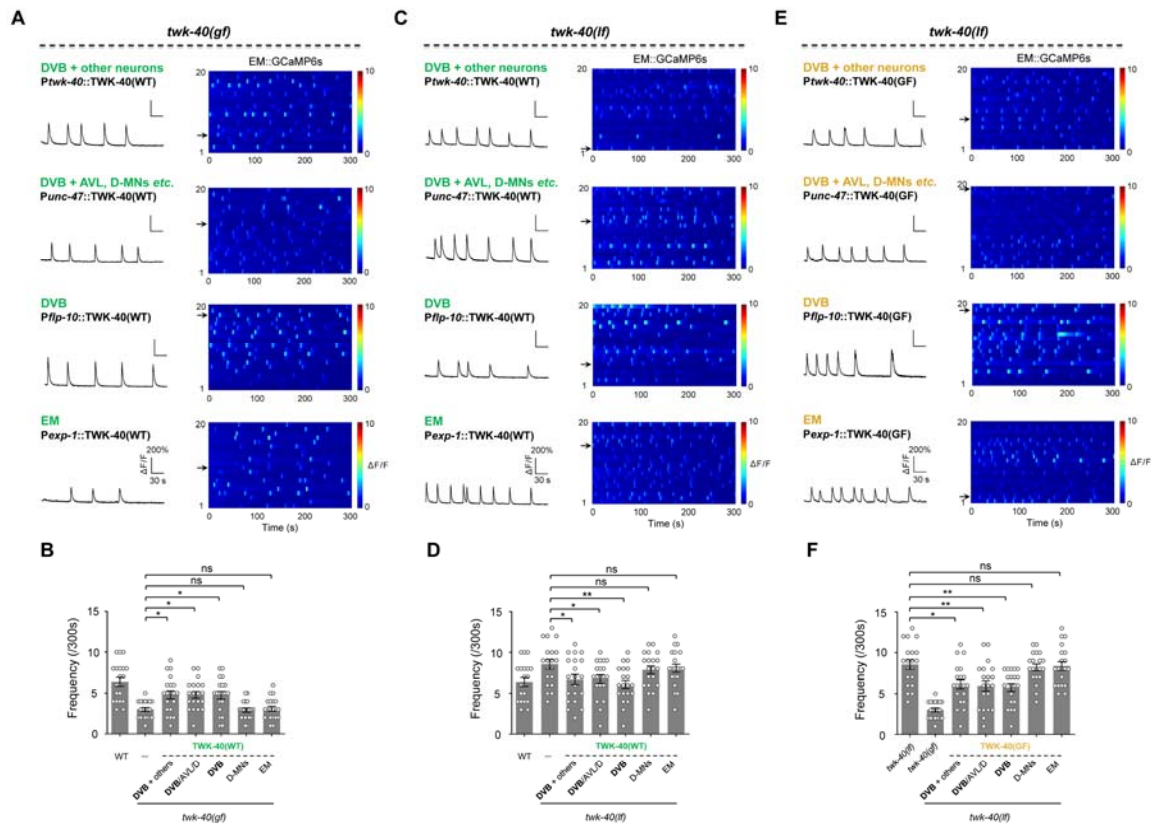

805

**Figure 6. DVB regulates enteric muscles  $Ca^{2+}$  dynamics in *twk-40* mutants**

(A, C) Representative EM  $Ca^{2+}$  traces (left) and color maps (right) in *twk-40(bln336, gf)* (A) and *twk-40(hp834, lf)* (C) for tissue-specific expression of TWK-40(WT). 1,

endogenous promoter *Ptwk-40*; 2, *Punc-47* promoter including DVB expression; 3, *Punc-*  
810 25 promoter lacking DVB expression; 4, *Pexp-1* promoter for enteric muscle expression.

(B, D) Rescue of EM  $Ca^{2+}$  transient frequency by expression of TWK-40(WT) in DVB,

but not enteric muscles or other neurons, n=20. (E) Representative EM  $Ca^{2+}$  traces (left)

and color maps (right) in *twk-40(hp834, lf)* following tissue-specific expression of TWK-

40(L159N). (F) Reduction of EM  $Ca^{2+}$  transient frequency following TWK-40(L159N)

815 expression in DVB, but not in enteric muscles or other neurons, n=20. All data are

expressed as means  $\pm$  SEM. One-way ANOVA test was used, in which: ns, not

significant, \* $P < 0.05$ , \*\* $P < 0.01$  in comparison with that as denoted.



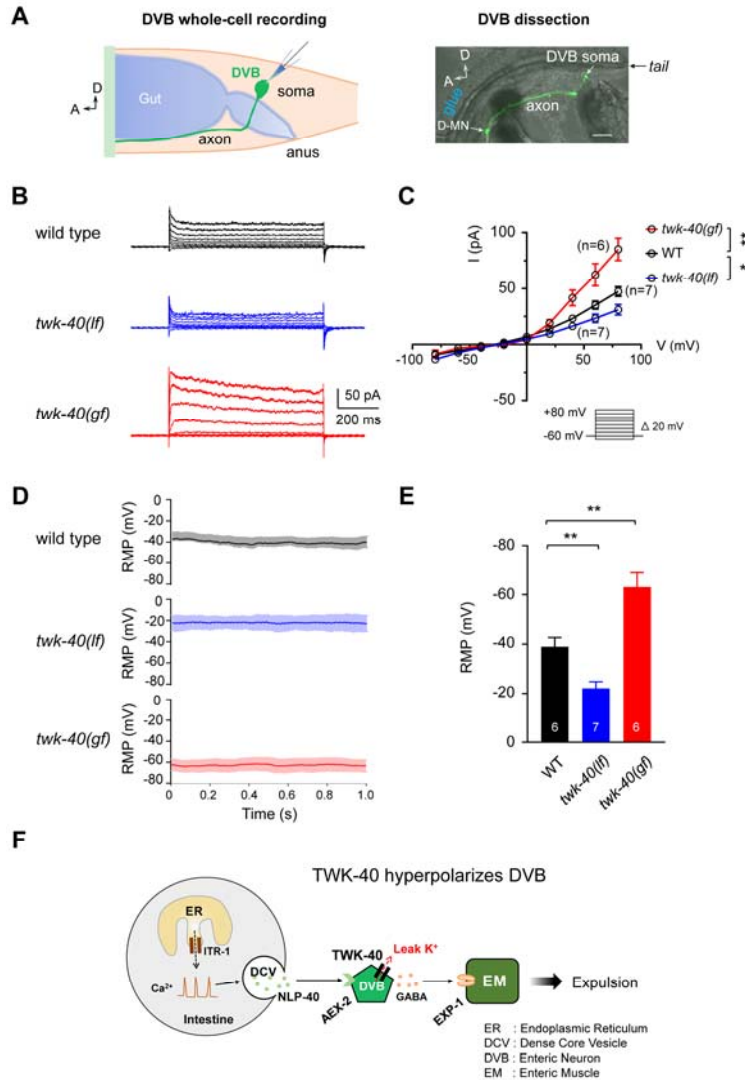

**Figure 7. TWK-40 hyperpolarizes the DVB neuron.**

820 (A) *Left*, schematic representation of *C. elegans* DVB neuron for whole-cell patch clamp recording. *Right*, GFP-labeled DVB soma and axon. (B) Representative outward  $K^+$  currents recorded from DVB neurons in different genotypes. (C) Quantification of the current-voltage curves from different genotypes reveals that the outward currents were reduced in *twk-40(hp834, lf)* mutant, but increased in *twk-40(bln336, gf)* mutant. (D, E)

825 Representative traces and quantification of the resting membrane potential (RMP) recorded from DVB in different genotypes. (F) The working Model:  $K_{2P}$  channel TWK-

40 regulates the rhythmic expulsion behavior by setting the resting membrane potential of DVB neuron. One-way ANOVA test was used to test the significant difference of average currents at +80 mV, in which: ns, not significant,  $*P < 0.05$ ,  $**P < 0.01$  in comparison with that as denoted.

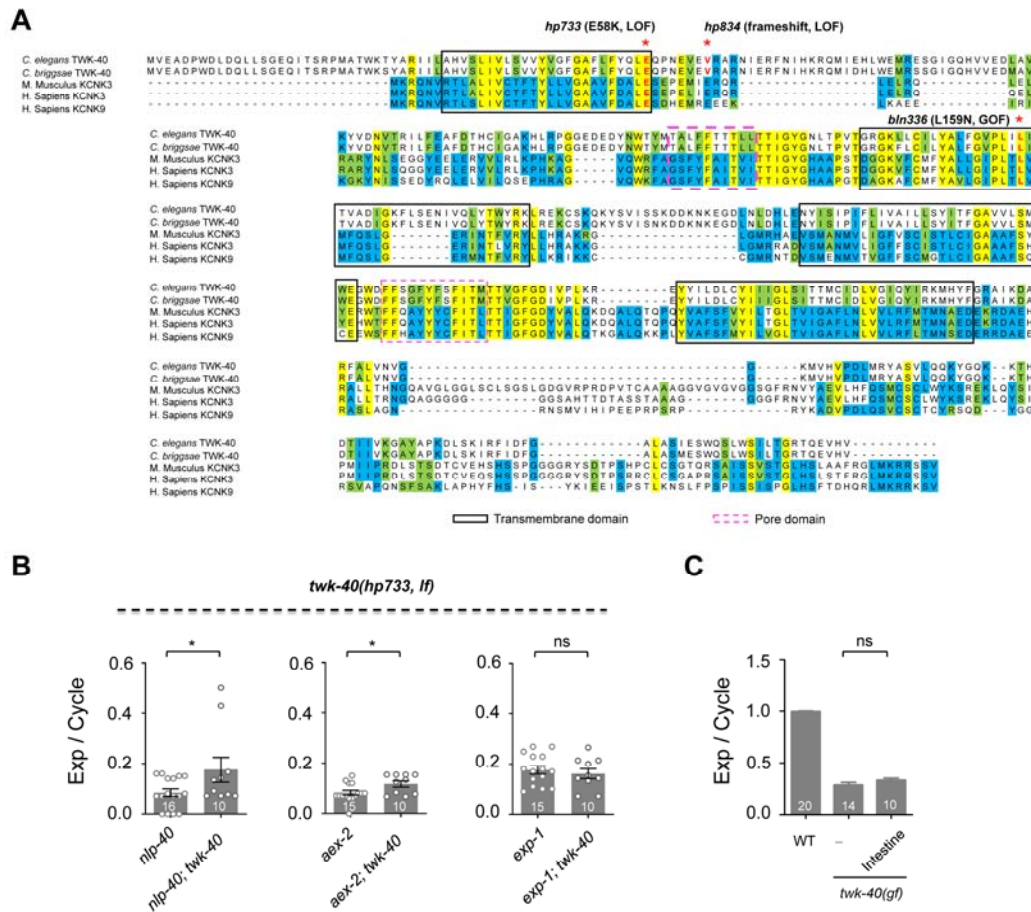

**Supplementary Figure 1. TWK-40 conservation, domain structure and gene mutations.**

(A) TWK-40 amino acid sequence alignment with other species. Identical amino acids are highlighted in yellow. Black boxes denote the transmembrane domains, pink dashed boxes denote the pore domains. Gene mutations are labeled on top of the sequence. (B)

TWK-40 E58K suppresses the expulsion frequency per defecation cycle defects of *nlp-40*

and *aex-2* mutants, but not *exp-1* mutants. (C) Expression of TWK-40(WT) in the intestine does not rescue the expulsion defect of *twk-40(bln336, gf)*. All data are expressed as means  $\pm$  SEM. Student's *t*-test was used, in which: ns, not significant, \**P* < 0.05, in comparison with that as denoted.

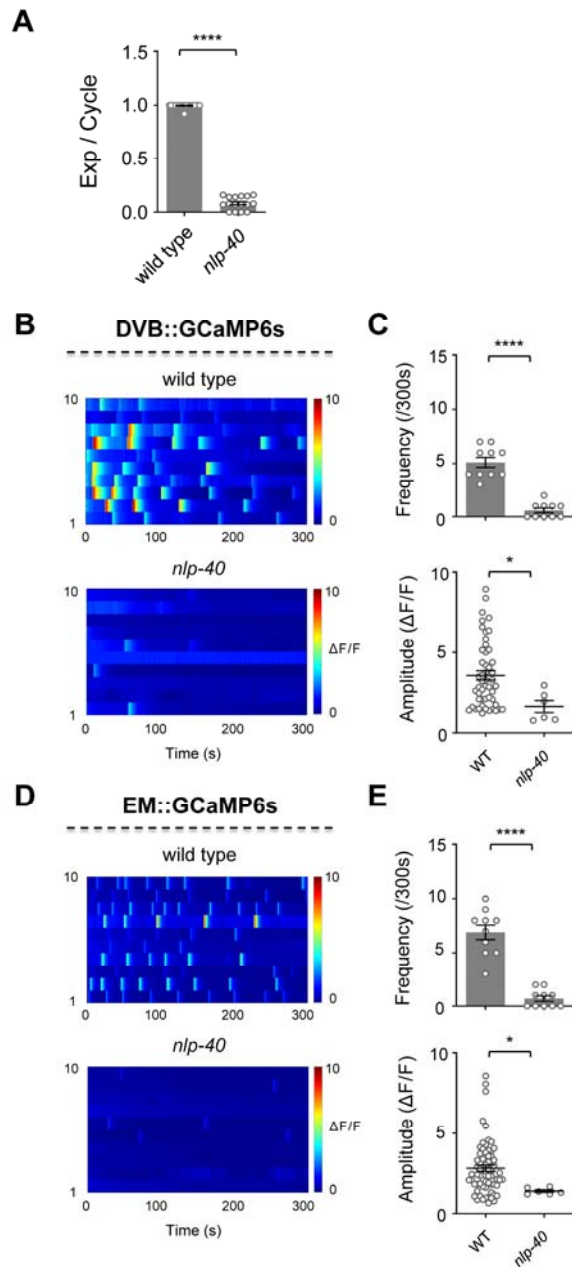

**Supplementary Figure 2. DVB/EM  $Ca^{2+}$  activities are dependent upon *nlp-40*.**

(A) Quantification of the expulsion frequency in *nlp-40(tm4085)* mutant. (B, D) Color maps summarize the DVB  $Ca^{2+}$  and EM  $Ca^{2+}$  activities in wild type and *nlp-40* animals, respectively. (C, E) Quantification of the frequency and peak amplitude of these  $Ca^{2+}$  activities. \* $P < 0.05$ ; \*\*\*\* $P < 0.0001$ ; two-tailed unpaired Student's t-test. n = 10-30 animals. Error bars, SEM.

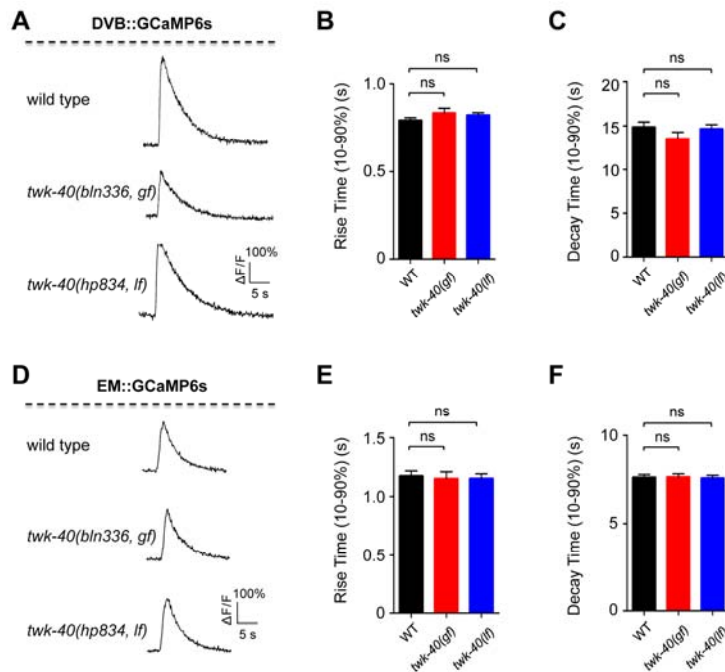

**Supplementary Figure 3. *twk-40* mutation does not alter  $Ca^{2+}$  dynamics in DVB and enteric muscles.**

(A, D) Representative single  $Ca^{2+}$  transients from DVB (A) and enteric muscle (D) in wild type, *twk-40(bln336, gf)* and *twk-40(hp834, lf)* animals, respectively. (B, C, E, F) The rise time (10-90%) and decay time (10-90%) of the  $Ca^{2+}$  transients exhibited no difference between these genotypes. Each group, n=20 animals. All data are expressed as means  $\pm$  SEM. One-way ANOVA test was used, in which: ns, not significant, in comparison with that as denoted.

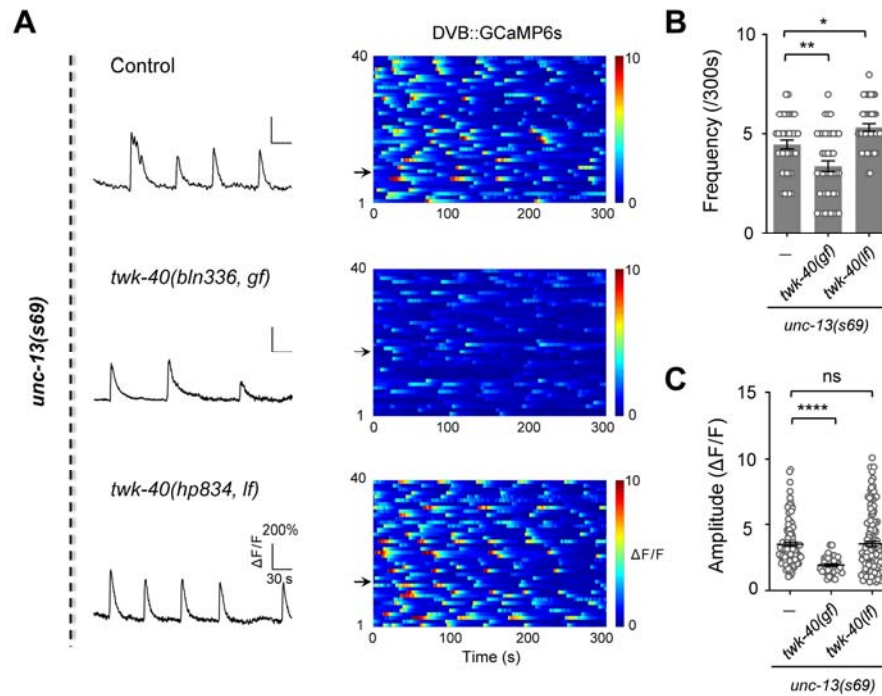

**Supplementary Figure 4. *twk-40* regulates DVB  $Ca^{2+}$  oscillations in *unc-13(lf)***

**background.**

860 (A) Representative DVB recordings (*left*) and color maps of rhythmic  $Ca^{2+}$  oscillations (*right*) in *unc-13(s69)*, *unc-13(s69); twk-40(bln336, gf)*, and *unc-13(s69); twk-40(hp834, lf)* mutants, respectively. (B, C) Quantification of the frequency and amplitude of DVB  $Ca^{2+}$  transients in different mutants. The frequency and amplitude were significantly reduced in *unc-13(s69); twk-40(bln336, gf)* mutants compared to *unc-13(s69)*. The  $Ca^{2+}$  frequency was slightly increased in *twk-40(hp834, lf)* mutant, but the amplitude was not altered. Each group, n=40. All data are expressed as means  $\pm$  SEM. One-way ANOVA test was used, in which: ns, not significant, \* $P < 0.05$ , \*\* $P < 0.01$ , \*\*\*\* $P < 0.0001$  in comparison with that as denoted.

865

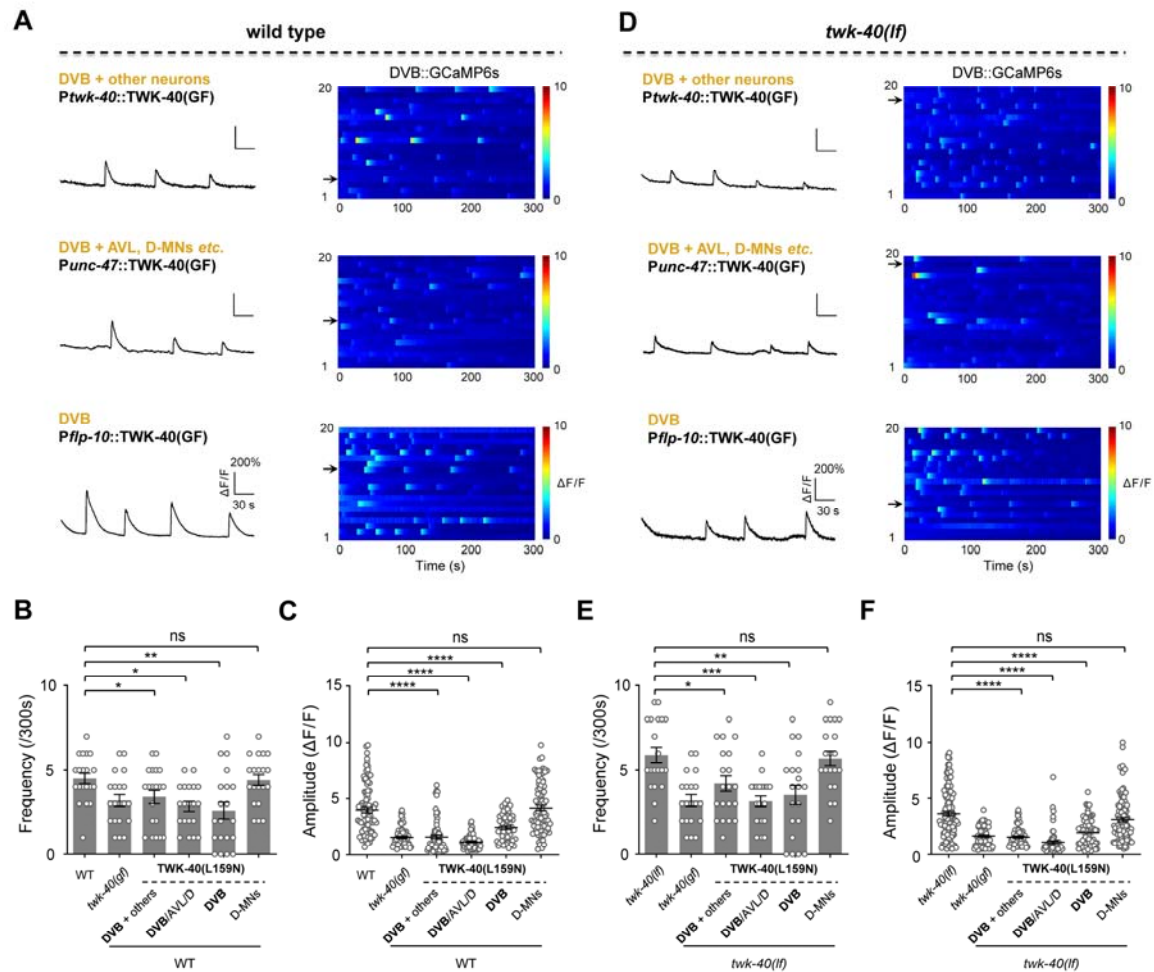

870 **Supplementary Figure 5. Ectopic expression of TWK-40(L159N) inhibits DVB**

(A, D) Representative  $\text{Ca}^{2+}$  traces (*left*) and color maps (*right*) for DVB neurons in wild type (A) and *twk-40(hp834, lf)* (D) following expression of TWK-40(L159N) in different neuron groups. *Upper*, endogenous *twk-40* promoter; *middle*, *unc-47* promoter including DVB expression; *bottom*, short *unc-25* promoter (*Punc-25s*) lacking DVB expression. (B, 875 C, E, F) Quantification of the frequency and amplitude of the oscillated DVB  $\text{Ca}^{2+}$  transients in different genetic backgrounds, both of which were reduced when TWK-40(L159N) was expressed in the DVB, but not in other neurons, n=20. All data are expressed as means  $\pm$  SEM. One-way ANOVA test was used, in which: ns, not

significant,  $*P < 0.05$ ,  $**P < 0.01$ ,  $***P < 0.001$ ,  $****P < 0.0001$  in comparison with  
880 that as denoted.

Supplementary Table 1

| <b>Strains</b> | <b>Genotype</b>                            | <b>Source</b> |
|----------------|--------------------------------------------|---------------|
| ZM9786         | <i>twk-40(bln336, gf)</i>                  | M. Zhen Lab   |
| ZM8302         | <i>twk-40(hp834, lf)</i>                   | M. Zhen Lab   |
| JT3            | <i>aex-2(sa3)</i>                          | CGC           |
| NM4394         | <i>nlp-40(tm4085)</i>                      | CGC           |
| JT6            | <i>exp-1(sa6)</i>                          | CGC           |
| ZM8661         | <i>unc-13(s69)</i>                         | M. Zhen Lab   |
| ZM8518         | <i>hpIs468 [Punc-47::GCaMP6s:wCherry]</i>  | M. Zhen Lab   |
| ZM9095         | <i>hpIs582 [Pexp-1::GCaMP6s::wCherry]</i>  | M. Zhen Lab   |
| SGA359         | <i>aex-2(sa3); twk-40(hp834)</i>           | This study    |
| SGA360         | <i>nlp-40(tm4085); twk-40(hp834)</i>       | This study    |
| SGA372         | <i>exp-1(sa6); twk-40(hp834)</i>           | This study    |
| SGA370         | <i>aex-2(sa3); twk-40(bln336)</i>          | This study    |
| SGA371         | <i>nlp-40(tm4085); twk-40(bln336)</i>      | This study    |
| SGA373         | <i>exp-1(sa6); twk-40(bln336)</i>          | This study    |
| SGA374         | <i>aex-2(sa3); hpIs468</i>                 | This study    |
| SGA375         | <i>aex-2(sa3); twk-40(hp834); hpIs468</i>  | This study    |
| SGA277         | <i>aex-2(sa3); twk-40(bln336); hpIs468</i> | This study    |



|        |                                                                             |            |
|--------|-----------------------------------------------------------------------------|------------|
| SGA331 | <i>unc-13(s69); hpIs468</i>                                                 | This study |
| SGA332 | <i>unc-13(s69); twk-40(hp834); hpIs468</i>                                  | This study |
| SGA376 | <i>unc-13(s69); twk-40(bln336); hpIs468</i>                                 | This study |
| SGA85  | <i>twk-40(bln336); hpIs468</i>                                              | This study |
| SGA84  | <i>twk-40(bln336, gf); hpIs582</i>                                          | This study |
| SGA83  | <i>twk-40(hp834); hpIs468</i>                                               | This study |
| SGA82  | <i>twk-40(hp834); hpIs582</i>                                               | This study |
| SGA61  | <i>twk-40(bln336); gaaEx061 [Ptwk-40::TWK-40(WT)::sl2dGFP]</i>              | This study |
| SGA62  | <i>twk-40(bln336); gaaEx062 [Punc-47::TWK-40(WT)::sl2dGFP]</i>              | This study |
| SGA71  | <i>twk-40(bln336); gaaEx071 [Punc-25::TWK-40(WT)::sl2dGFP]</i>              | This study |
| SGA63  | <i>N<sub>2</sub>; gaaEx063 [Ptwk-40::TWK-40(GF)::sl2dGFP]</i>               | This study |
| SGA78  | <i>N<sub>2</sub>; gaaEx078 [Punc-47::TWK-40(GF)::sl2dGFP]</i>               | This study |
| SGA70  | <i>N<sub>2</sub>; gaaEx070 [Punc-25::TWK-40(GF)::sl2dGFP]</i>               | This study |
| SGA64  | <i>twk-40(hp834); gaaEx064 [Ptwk-40::TWK-40(GF)::sl2dGFP]</i>               | This study |
| SGA76  | <i>twk-40(hp834); gaaEx076 [Punc-47::TWK-40(GF)::sl2dGFP]</i>               | This study |
| SGA77  | <i>twk-40(hp834); gaaEx077 [Punc-25::TWK-40(GF)::sl2dGFP]</i>               | This study |
| SGA89  | <i>twk-40(bln336); hpIs468; gaaEx089 [Ptwk-40::TWK-40(WT)::sl2dwCherry]</i> | This study |
| SGA98  | <i>twk-40(bln336); hpIs468; gaaEx098 [Punc-47::TWK-40(WT)::sl2dwCherry]</i> | This study |

|        |                                                                              |            |
|--------|------------------------------------------------------------------------------|------------|
| SGA95  | <i>twk-40(bln336); hpIs468; gaaEx095 [Punc-25::TWK-40(WT)::sl2dwCherry]</i>  | This study |
| SGA90  | <i>twk-40(hp834); hpIs468; gaaEx090 [Ptwk-40::TWK-40(WT)::sl2dwCherry]</i>   | This study |
| SGA93  | <i>twk-40(hp834); hpIs468; gaaEx093 [Punc-47::TWK-40(WT)::sl2dwCherry]</i>   | This study |
| SGA96  | <i>twk-40(hp834); hpIs468; gaaEx096 [Punc-25::TWK-40(WT)::sl2dwCherry]</i>   | This study |
| SGA86  | <i>hpIs468; gaaEx086 [Ptwk-40::TWK-40(GF)::sl2dwCherry]</i>                  | This study |
| SGA94  | <i>hpIs468; gaaEx094 [Punc-47::TWK-40(GF)::sl2dwCherry]</i>                  | This study |
| SGA91  | <i>hpIs468; gaaEx091 [Punc-25::TWK-40(GF)::sl2dwCherry]</i>                  | This study |
| SGA280 | <i>N2; gaaEx0112 [Punc-47::GFP::3'UTR; Pmyo-2::GFP]</i>                      | This study |
| SGA87  | <i>twk-40(hp834); hpIs468; gaaEx087 [Ptwk-40::TWK-40(GF)::sl2dwCherry]</i>   | This study |
| SGA97  | <i>twk-40(hp834); hpIs468; gaaEx097 [Punc-47::TWK-40(GF)::sl2dwCherry]</i>   | This study |
| SGA92  | <i>twk-40(hp834); hpIs468; gaaEx092 [Punc-25::TWK-40(GF)::sl2dwCherry]</i>   | This study |
| SGA112 | <i>twk-40(bln336); hpIs582; gaaEx0111 [Ptwk-40::TWK-40(WT)::sl2dwCherry]</i> | This study |
| SGA290 | <i>twk-40(bln336); hpIs582; gaaEx0118 [Punc-47::TWK-40(WT)::sl2dwCherry]</i> | This study |
| SGA111 | <i>twk-40(bln336); hpIs582; gaaEx0110 [Punc-25::TWK-40(WT)::sl2dwCherry]</i> | This study |
| SGA297 | <i>twk-40(bln336); hpIs582; gaaEx0122 [Pexp-1::TWK-40(WT)::sl2dwCherry]</i>  | This study |
| SGA106 | <i>twk-40(hp834); hpIs582; gaaEx0106 [Ptwk-40::TWK-40(WT)::sl2dwCherry]</i>  | This study |
| SGA107 | <i>twk-40(hp834); hpIs582; gaaEx0107 [Punc-47::TWK-40(WT)::sl2dwCherry]</i>  | This study |

|         |                                                                             |            |
|---------|-----------------------------------------------------------------------------|------------|
| SGA291  | <i>twk-40(hp834); hpIs582; gaaEx0119 [Punc-25::TWK-40(WT)::sl2dwCherry]</i> | This study |
| SGA298  | <i>twk-40(hp834); hpIs582; gaaEx0123 [Pexp-1::TWK-40(WT)::sl2dwCherry]</i>  | This study |
| SGA108  | <i>twk-40(hp834); hpIs582; gaaEx0108 [Ptwk-40::TWK-40(GF)::sl2dwCherry]</i> | This study |
| SGA105  | <i>twk-40(hp834); hpIs582; gaaEx0105 [Punc-47::TWK-40(GF)::sl2dwCherry]</i> | This study |
| SGA338  | <i>twk-40(hp834); hpIs582; gaaEx0145 [Punc-25::TWK-40(GF)::sl2dwCherry]</i> | This study |
| SGA299  | <i>twk-40(hp834); hpIs582; gaaEx0124 [Pexp-1::TWK-40(GF)::sl2dwCherry]</i>  | This study |
| SGA996  | <i>twk-40(gf); hpIs468; gaaEx1251 [Pflp-10::TWK-40(WT)::sl2eTagRFP]</i>     | This study |
| SGA997  | <i>hpIs468; gaaEx1252 [Pflp-10::TWK-40(GF)::sl2eTagRFP]</i>                 | This study |
| SGA998  | <i>twk-40(lf); hpIs468; gaaEx1253 [Pflp-10::TWK-40(GF)::sl2eTagRFP]</i>     | This study |
| SGA999  | <i>twk-40(lf); hpIs468; gaaEx1254 [Pflp-10::TWK-40(WT)::sl2eTagRFP]</i>     | This study |
| SGA1000 | <i>twk-40(gf); hpIs582; gaaEx1255 [Pflp-10::TWK-40(WT)::sl2eTagRFP]</i>     | This study |
| SGA1001 | <i>twk-40(lf); hpIs582; gaaEx1256 [Pflp-10::TWK-40(WT)::sl2eTagRFP]</i>     | This study |
| SGA1002 | <i>twk-40(lf); hpIs582; gaaEx1257 [Pflp-10::TWK-40(GF)::sl2eTagRFP]</i>     | This study |

Supplementary Table 2

| <b>Plasmids</b> | <b>Detail</b>              | <b>Source</b> |
|-----------------|----------------------------|---------------|
| SG331           | <i>Ptwk-40(slot1)</i>      | This study    |
| SG42            | <i>Punc-47(slot1)</i>      | This study    |
| SG22            | <i>Punc-25(slot1)</i>      | This study    |
| SG324           | <i>Pexp-1(slot1)</i>       | This study    |
| SG137           | <i>Pges-1(slot1)</i>       | This study    |
| SG332           | <i>TWK-40(WT)(slot2)</i>   | This study    |
| SG333           | <i>TWK-40(GF)(slot2)</i>   | This study    |
| SG62            | <i>GFP(slot2)</i>          | This study    |
| SG64            | <i>RFP(slot2)</i>          | This study    |
| SG44            | <i>sl2dGFP(slot3)</i>      | This study    |
| SG144           | <i>sl2dwCherry(slot3)</i>  | This study    |
| SG334           | <i>Ptwk-40::GFP::3'UTR</i> | This study    |
| SG335           | <i>Punc-47::RFP::3'UTR</i> | This study    |

|       |                                         |            |
|-------|-----------------------------------------|------------|
| SG336 | <i>Ptwk-40::TWK-40(WT)::sl2dGFP</i>     | This study |
| SG337 | <i>Punc-47::TWK-40(WT)::sl2dGFP</i>     | This study |
| SG338 | <i>Punc-25::TWK-40(WT)::sl2dGFP</i>     | This study |
| SG339 | <i>Pges-1::TWK-40(WT)::sl2dGFP</i>      | This study |
| SG340 | <i>Ptwk-40::TWK-40(GF)::sl2dGFP</i>     | This study |
| SG341 | <i>Punc-47::TWK-40(GF)::sl2dGFP</i>     | This study |
| SG342 | <i>Punc-25::TWK-40(GF)::sl2dGFP</i>     | This study |
| SG343 | <i>Ptwk-40::TWK-40(WT)::sl2dwCherry</i> | This study |
| SG344 | <i>Punc-47::TWK-40(WT)::sl2dwCherry</i> | This study |
| SG345 | <i>Punc-25::TWK-40(WT)::sl2dwCherry</i> | This study |
| SG346 | <i>Pexp-1::TWK-40(WT)::sl2dwCherry</i>  | This study |
| SG347 | <i>Ptwk-40::TWK-40(GF)::sl2dwCherry</i> | This study |
| SG348 | <i>Punc-47::TWK-40(GF)::sl2dwCherry</i> | This study |
| SG349 | <i>Punc-25::TWK-40(GF)::sl2dwCherry</i> | This study |
| SG350 | <i>Pexp-1::TWK-40(GF)::sl2dwCherry</i>  | This study |

|       |                                        |            |
|-------|----------------------------------------|------------|
| SG632 | <i>Pflp-10::TWK-40(WT)::sl2eTagRFP</i> | This study |
| SG633 | <i>Pflp-10::TWK-40(GF)::sl2eTagRFP</i> | This study |
